# 1 **Assessment of the Potential Role of *Streptomyces* in Cave Moonmilk**

## 2 **Formation**

3 Marta Maciejewska<sup>1</sup>, Delphine Adam<sup>1</sup>, Aymeric Naômé<sup>1</sup>, Loïc Martinet<sup>1</sup>, Elodie Tenconi<sup>1</sup>,  
4 Magdalena Całusińska<sup>2</sup>, Philippe Delfosse<sup>2</sup>, Marc Hanikenne<sup>3,4</sup>, Denis Baurain<sup>4,5</sup>, Philippe  
5 Compère<sup>6</sup>, Monique Carnol<sup>7</sup>, Hazel Barton<sup>8</sup>, and Sébastien Rigali<sup>1\*</sup>

6  
7 <sup>1</sup>InBioS - Centre for Protein Engineering, Institut de Chimie B6a, University of Liège, B-4000,  
8 Liège, Belgium

9 <sup>2</sup>Environmental Research and Innovation Department, Luxembourg Institute of Science and  
10 Technology, Rue du Brill 41, Belvaux, L-4422, Luxembourg

11 <sup>3</sup>InBioS - Functional Genomics and Plant Molecular Imaging, University of Liège, B-4000 Liège,  
12 Belgium

13 <sup>4</sup>PhytoSYSTEMS, University of Liège, B-4000 Liège, Belgium

14 <sup>5</sup>InBioS – Eukaryotic Phylogenomics, University of Liège, B-4000, Liège, Belgium

15 <sup>6</sup>Department of Biology, Ecology and Evolution & Centre of Aid for Research and Education in  
16 Microscopy (CAREm-ULg), Institute of Chemistry B6a University of Liège, B-4000, Liège,  
17 Belgium

18 <sup>7</sup>InBioS - Plant and Microbial Ecology, Botany B22, University of Liège, B-4000, Liège, Belgium

19 <sup>8</sup>Department of Biology, University of Akron, Akron, Ohio, United States of America

20 \*Corresponding author. E-mail: [srigali@ulg.ac.be](mailto:srigali@ulg.ac.be); Tel: +32 4 366 98 30; Fax: +32 4 366 33 64

21 **Keywords:** biomineralization, moonmilk genesis, geomicrobiology, carbonatogenesis, cave  
22 microbiology

## 23 **Abstract**

24 Moonmilk is a karstic speleothem mainly composed of fine calcium carbonate crystals (CaCO<sub>3</sub>)  
25 with different textures ranging from pasty to hard, in which the contribution of biotic rock-building  
26 processes is presumed to involve indigenous microorganisms. The real bacterial input in the genesis  
27 of moonmilk is difficult to assess leading to controversial hypotheses explaining the origins and  
28 the mechanisms (biotic versus abiotic) involved. In this work we undertook a comprehensive  
29 approach in order to assess the potential role of filamentous bacteria, particularly a collection of  
30 moonmilk-originating *Streptomyces*, in the genesis of this speleothem. Scanning electron  
31 microscopy (SEM) confirmed that indigenous filamentous bacteria could indeed participate in  
32 moonmilk development by serving as nucleation sites for CaCO<sub>3</sub> deposition. The metabolic  
33 activities involved in CaCO<sub>3</sub> transformation were furthermore assessed *in vitro* among the  
34 collection of moonmilk *Streptomyces*, which revealed that peptides/amino acids ammonification,  
35 and to a lesser extent ureolysis, could be privileged metabolic pathways participating in carbonate  
36 precipitation by increasing the pH of the bacterial environment. Additionally, *in silico* search for  
37 the genes involved in biomineralization processes including ureolysis, dissimilatory nitrate  
38 reduction to ammonia, active calcium ion transport, and reversible hydration of CO<sub>2</sub> allowed to  
39 identify genetic predispositions for carbonate precipitation in *Streptomyces*. Finally, their  
40 biomineralization abilities were confirmed by environmental SEM, which allowed to visualize the  
41 formation of abundant mineral deposits under laboratory conditions. Overall, our study provides  
42 novel evidences that filamentous Actinobacteria could be key protagonists in the genesis of  
43 moonmilk through a wide spectrum of biomineralization processes.

44

## 45 **Introduction**

46           The hypogean environment, although highly deprived of nutrients, sustains a diverse  
47 microbial life. This subterranean microbiome plays an important ecological role in caves, with  
48 secondary effects on mineralogy, including host rock dissolution or mineral precipitation, leading  
49 to the formation of various secondary mineral deposits termed speleothems (Barton and Northup  
50 2007; Jones 2010; Cuezva et al. 2012). A biogenic origin has been hypothesized for a number of  
51 speleothems, including coralloids (Banks et al. 2010), pool fingers (Melim et al. 2001),  
52 ferromanganese deposits (Northup et al. 2003; Spilde et al. 2005), helictites (Tisato et al. 2015),  
53 and moonmilk (Cañaveras et al. 2006). Unlike typical mineral deposits, moonmilk is present as a  
54 soft and pasty precipitate on cave surfaces and within pools (Richter et al. 2008; Cacchio et al.  
55 2014). The origin of moonmilk has been controversial for many years due to the complex  
56 mineralogy, the atypical crystalline morphology, and also the size of its crystals (Verrecchia and  
57 Verrecchia 1994; Cañaveras et al. 1999; Cañaveras et al. 2006; Bindschedler et al. 2010;  
58 Bindschedler et al. 2014). Notably, moonmilk deposits are characterized by several crystal habits  
59 including nano-fibers, and micro-meter sized needle-fiber crystals in a form of monocrystalline  
60 rods and polycrystalline chains (Cañaveras et al. 1999; Cañaveras et al. 2006; Bindschedler et al.  
61 2010; Bindschedler et al. 2014). While initially postulated as a speleothem of abiotic origin  
62 (Harmon et al. 1983; Borsato et al. 2000), recent studies attributed the genesis of moonmilk to  
63 indigenous microbial population (Cañaveras et al. 2006; Cailleau et al. 2009; Baskar et al. 2011;  
64 Braissant et al. 2012).

65           Microbial carbonate precipitation (MCP) is a broad spectrum phenomenon either mediated  
66 by autotrophic pathways, such as photosynthesis and methanogenesis that lead to depletion of local

67 CO<sub>2</sub>, or heterotrophic pathways that alter local conditions to promote CaCO<sub>3</sub> precipitation  
68 (Castanier et al. 2000; Banks et al. 2010). Caves are devoid of sunlight, ruling out photosynthesis,  
69 while methanogenesis has been documented rarely in these systems. Heterotrophic processes may  
70 therefore play an important role (Banks et al. 2010). Active calcite precipitation by heterotrophs in  
71 calcium-rich environments has been hypothesized to be the consequence of a detoxification  
72 process, wherein the acidification of the local environment induced by passive influx of Ca requires  
73 growing cells that would actively export the excess of this metal to maintain cellular calcium  
74 homeostasis (Banks et al. 2010). Such metal detoxification strategies have also been linked to the  
75 formation of the unusual speleothems known as helictites (Tisato et al. 2015). Heterotrophic growth  
76 can also increase the environmental pH, which can in turn increase the saturation index of CaCO<sub>3</sub>  
77 and drive precipitation. Calcite precipitation through nitrogen metabolism is thought to operate by  
78 different metabolic pathways, including ureolysis, ammonification through amino acid and peptide  
79 catabolism, and dissimilatory nitrate reduction to ammonia (DNRA), all of which increase the local  
80 pH (Fig. 1) (Castanier et al. 2000).

81 Moonmilk was reported to host wide spectrum of microbiota, including Archaea, Bacteria,  
82 and Fungi (Rooney et al. 2010; Portillo and Gonzalez 2011; Engel et al. 2013; Reitschuler et al.  
83 2014; Reitschuler et al. 2015; Axenov-Gibanov et al. 2016; Maciejewska et al. 2016; Reitschuler  
84 et al. 2016). Among this microbiome, Fungi and filamentous microorganisms, particularly  
85 members of Actinobacteria phylum were reported to be possibly involved in the moonmilk genesis  
86 (Cañaveras et al. 2006; Bindschedler et al. 2010; Bindschedler et al. 2014). Bindschedler et al.  
87 (2010, 2014) suggested that the presence of nano-fibers within the crystalline structure of  
88 moonmilk was associated with biomineralized fungal hyphae. The authors suggest that organized  
89 networks of nano-fibers, often observed in moonmilk, could represent fibrous fungal cell wall  
90 polymers, such as chitin and  $\beta$ -(1→3)glucans (Bindschedler et al. 2010). On the other hand, the



91 observation of unstructured aggregates of unconsolidated microcrystalline fibers with calcified  
92 Actinobacteria-like filaments led Cañaveras et al. (2006) to propose a model of moonmilk  
93 formation wherein Actinobacteria promoted calcium carbonate precipitation by creating locally  
94 favorable conditions, with the bacterial cell walls serving as nucleation zones (Cañaveras et al.  
95 2006). The presence of metabolically active microorganisms in moonmilk was demonstrated using  
96 isothermal microcalorimetry (Braissant et al. 2012), although the progressive accumulation of  
97 CaCO<sub>3</sub> (and presumably entombment) ultimately leads to a decrease of the microbial activity  
98 (Cañaveras et al. 2006; Sanchez-Moral et al. 2012). As a result, microorganisms would play a  
99 significant role in the initiation of moonmilk formation, which ultimately would be overtaken by  
100 abiotic processes leading to the growth of the deposit, which can reach up to 1 m in thickness  
101 (Sanchez-Moral et al. 2012).

102 In all of these studies, there has been no clear distinction as to whether the increase or  
103 decrease in local pH is ultimately leading to the precipitation of moonmilk by the dominant  
104 actinobacterial species observed. In this work we use a combination of microscopy, cultivation and  
105 genomic approaches to provide an *in vitro* and *in silico* assessment of the actinobacterial metabolic  
106 activities that could promote CaCO<sub>3</sub> precipitation. Our data suggest that the *Streptomyces* species  
107 would play an important role in nitrogen metabolism, which could locally raise pH and contribute  
108 to moonmilk formation.

109

## 110 **Materials and methods**

### 111 **Moonmilk sampling and *Streptomyces* strains used in this study**

112 Samples for microscopy and cultivation were taken from moonmilk deposits originating from three  
113 sampling points (collection points COL1, COL3, COL4, supplementary Fig. 1 from Maciejewska

114 et al. 2016) in the upper Viséan limestone cave ‘Grotte des Collembolés’ (Springtails’ Cave),  
115 Comblain-au-Pont, Belgium (more detailed cave description in supplementary Fig. 1).  
116 Moonmilk samples for strains isolation were brought to the laboratory on ice and stored at 4°C  
117 prior to lyophilization. Extensive attempts at the cultivation of Actinobacteria led to the isolation  
118 of 31 phylogenetically distinct *Streptomyces* strains representing phylogenetically distinct  
119 phylotypes (as previously described in Maciejewska et al. 2016 and supplementary Fig. 2).  
120 Moonmilk samples for scanning electron microscopy (SEM) were preserved in two separate  
121 fixative solutions, 2.5% glutaraldehyde in 0.1 M Na-acetate buffer (pH 7.4), and 100% ethanol,  
122 and stored at 4°C until analysis. To exclude the effect of fixatives on the crystalline structure of  
123 moonmilk, the lyophilized samples were also observed under the microscope as controls (data not  
124 shown).

125  
126 **Environmental scanning electron microscopy (ESEM) and elemental X-ray energy dispersive**  
127 **microanalysis (EDS)**

128 Glutaraldehyde-fixed moonmilk samples were post-fixed in 1% osmium tetroxide (OsO<sub>4</sub>) in  
129 distilled water, rinsed and dehydrated through a graded ethanol series (30-100%). Glutaraldehyde-  
130 fixed samples and ethanol-preserved samples were then processed by critical point drying, prior to  
131 mounting on the glass slides covered by double-side carbon tape together with lyophilized samples.  
132 Parts of each sample were mounted to expose the outer surface, a vertical section or fracture made  
133 with a scalpel blade. Dry samples were subsequently sputter coated with platinum on Balzers  
134 sputtering Unit SCD 030 (Balzers, Lichtenstein).

135 The production of mineral deposits by isolates MM24 and MM99 following growth in two different  
136 culture conditions - calcite precipitation agar (CPA) and modified B-4 medium (more details in  
137 CaCO<sub>3</sub> precipitation section) was detected from the living bacterial colonies after being air-dried.

138 Morphological observations were performed by light microscopy (reflected, transmitted and  
139 polarized light) using an Olympus Provis AX-70 microscope fitted with a Visicam 5.0 videocamera  
140 for image capture. SEM observations were performed in an environmental scanning electron  
141 microscope FEI XL30 ESEM-FEG (Eindhoven, The Netherlands). Platinum-coated samples were  
142 observed under high vacuum (HV) conditions with the ET-secondary electron (SE) detector at 10  
143 mm working distance and 15 kV accelerating voltage. Air-dried cultures, were observed under low  
144 vacuum (LV) conditions (0.4 Torr) with the large field gaseous secondary electron (GSE) detector  
145 and the backscattered electron (BSE) detector at 10 mm working distance and 10 and 20 kV  
146 accelerating voltage, respectively. As a result of applying two types of detection – GSE and BSE,  
147 the contrast of the images due to the surface morphology or due to the atomic number of the  
148 elements and the density of minerals could be obtained. Elemental X-ray microanalysis and  
149 mapping was carried out using a Bruker silicon drift energy dispersive detector (SDD Quantax 129  
150 eV, Billerica, MA, USA) at 10-20 kV accelerating voltage with the Esprit 1.9 software. Semi-  
151 quantitative analyses of the elemental composition were done using the standard-less ZAF method  
152 with automatic background subtraction.

153

#### 154 **Genomic analysis of moonmilk-derived isolates**

155 The genes of interest (see Fig. 1) including those coding for i) the ureolytic system (*ure*), ii) the  
156  $\text{Ca}^{2+}/2\text{H}^{+}$  antiporter system (*chaA*), iii) the nitrate/nitrite reductases (*nar/nas/nir*) with the  
157 corresponding transporters (*narK*), and iv) the carbonic anhydrase (CA) together with sulfate  
158 transporter in cluster with CA (*sulP*) (Felce and Saier 2005), were retrieved from the genomes of  
159 moonmilk *Streptomyces* sequenced at the Luxembourg Institute of Science and Technology, as  
160 previously described (Maciejewska et al. 2016). These genes were first identified within the

161 chromosome of the model *Streptomyces* species – *Streptomyces coelicolor* (Bentley et al. 2002).  
162 The designations of the selected genes are listed in supplementary Table 1. Subsequently, genes  
163 sequences encoding the corresponding proteins were identified within the genomes of additional  
164 54 reference *Streptomyces* strains (supplementary Table 2) for which completely assembled  
165 genomes are available in NCBI FTP server (data retrieved on January 8<sup>th</sup> 2016).  
166 A total of 407,461 protein sequences were organized in clusters of orthologous groups (COGs)  
167 using Proteinortho v 5.12 (Lechner et al. 2010) with the PoFF extension to further discriminate  
168 similar sequences based on synteny. Created COGs were used as models to screen moonmilk  
169 *Streptomyces* genomes. For every *S. coelicolor* gene, the collection of protein sequences in the  
170 corresponding COG was used to build a hidden Markov model (HMM) profile (Eddy 1998). As an  
171 example, the gamma sub-unit of the urease metallo-protein of *S. coelicolor* (UreA, SCO1236)  
172 clusters in a COG with 52 sequences from other *Streptomyces* (supplementary Table 1). This COG  
173 is used to construct a HMM profile representing the UreA protein that is used to search a database  
174 of translated predicted coding sequences of the moonmilk *Streptomyces*. Partial coding sequences  
175 resulting from the fragmented nature of the moonmilk *Streptomyces* genomes were also considered  
176 in the screening. The moonmilk *Streptomyces* coding sequences were predicted with Prodigal  
177 v2.6.2 (Hyatt et al. 2010). HMM profile building and HMM search were carried out using the  
178 HMMER3 software package (v3.1b2, <http://hmmer.org/>). The accession numbers of genes  
179 recovered from moonmilk *Streptomyces* are compiled in the supplementary Table 3.

180

## 181 **Metabolic assays**

### 182 **Ammonification**

183 The ability of isolates to decompose organic nitrogen into ammonia was tested on nutrient agar  
184 containing: peptone, 5 g/l; beef extract, 3 g/l; NaCl, 5 g/l; phenol red, 0.012 g/l; agar, 15 g/l; pH

185 7.0 (Food and Agriculture Organization of the United Nations 1983). Each representative  
186 moonmilk *Streptomyces* isolate was spot-inoculated on an individual Petri dish and incubated for  
187 7 days at 28°C. *Citrobacter freundii* ATCC 43864 was used as a positive control strain, while  
188 uninoculated media was used as a negative control. The development of a pink color, indicating a  
189 pH increase due to the formation of ammonia following peptides/amino acids degradation was  
190 monitored every day during the incubation.

191

## 192 **Ureolysis**

193 Rapid screening of urease activity was performed on Christensen's Urea Agar Base (UAB) solid  
194 media as described previously (Hammad et al. 2013). The UAB medium was prepared as follows:  
195 urea, 20.0 g/l; NaCl, 5.0 g/l; peptone, 1.0 g/l; glucose, 1.0 g/l; KH<sub>2</sub>PO<sub>4</sub>, 2.0 g/l; phenol red, 0.012  
196 g/l and agar, 15.0 g/l; pH 6.5. All components of the media were autoclaved except urea which was  
197 filter-sterilized and added after autoclaving. The UAB medium without urea was used as a negative  
198 control. Both types of media were inoculated with representative of each phylotype together with  
199 urease negative control strain (*Escherichia coli* ATCC 25922) and urease positive control strain  
200 (*Klebsiella pneumoniae* ATCC 13883) and incubated at 28°C. Plates were examined continually  
201 to record development of the pink color indicating a pH increase as a result of urease enzyme  
202 activity, leading to generation of ammonia through urea degradation, according to the following  
203 reaction:  $(\text{NH}_2)_2\text{CO} + \text{H}_2\text{O} \rightarrow 2\text{NH}_3 + \text{CO}_2$ .

204

## 205 **Nitrate and nitrite reduction**

206 The assessment of nitrate and nitrite reduction was performed as described by Li et al. (2016), with  
207 small modifications. Briefly, the phylotypes were inoculated in nitrate or nitrite agar slants

208 (potassium nitrate / sodium nitrite, 1g/l; peptone, 5 g/l; beef extract, 3 g/l; agar, 12 g/l; pH 7.0) and  
209 nitrate / nitrite broth tubes (potassium nitrate / sodium nitrite, 1g/l; peptone, 5 g/l; beef extract, 3  
210 g/l; pH 7.0) equipped with the Durham tubes. *Escherichia coli* ATCC 25922 was used as a control  
211 strain for exclusive reduction of nitrate to nitrite, while *Pseudomonas aeruginosa* ATCC 27853 as  
212 a complete reducer of nitrate into the nitrogen gas, collected in the Durham tube. Uninoculated  
213 media were used as an additional control. Inoculated test tubes were incubated at 28°C for 9 days  
214 in static conditions, to reduce amount of dissolved oxygen. After incubation time few drops of  
215 sulfanilic acid and alpha-naphthylamine were added to each test tube, which together react with  
216 nitrite generating red/pink color. Reduction of nitrate ( $\text{NO}_3^-$ ) is indicated by appearance of red color  
217 in nitrate broth, while red color disappearance in nitrite broth indicates nitrite ( $\text{NO}_2^-$ ) reduction.

218

### 219 **Oxidative glucose breakdown**

220 The glucose oxidative test was carried out according to Hugh and Leifson (1953). Briefly, each  
221 representative of the phylotypes was spot-inoculated on Hugh and Leifson's OF basal medium,  
222 prepared as follows: peptone, 2.0 g/l; NaCl, 5.0 g/l; bromothymol blue, 0.03 g/l;  $\text{K}_2\text{HPO}_4$ , 0.3 g/l;  
223 agar, 3.0 g/l; pH 7.1. Filter-sterilized glucose was added after autoclaving to a final concentration  
224 of 1%. The OF medium not supplemented with glucose was used as a negative control, and  
225 oxidative *Pseudomonas aeruginosa* ATCC 27853 strain as a positive control. The inoculated plates  
226 were incubated at 28°C during 7 days and monitored continually to observe development of yellow  
227 color indicating on the acid production due to glucose metabolism.

228

### 229 **$\text{CaCO}_3$ precipitation**

230 The screening for isolates able to precipitate calcium carbonate through ureolysis was performed  
231 using calcite precipitation agar (CPA) as previously described (Stocks-Fischer et al. 1999). The

232 CPA medium was prepared as follows: (g/l); nutrient broth, 3.0 g/l; urea, 20.0 g/l; CaCl<sub>2</sub>\*2H<sub>2</sub>O,  
233 28.5 g/l; NaHCO<sub>3</sub>, 2.12 g/l; NH<sub>4</sub>Cl, 10.0 g/l; Agar, 15.0 g/l. All components were autoclaved apart  
234 from urea, which was added filter-sterilized. The same medium, but without urea, was used as an  
235 additional control. Alternatively, precipitation of CaCO<sub>3</sub> was tested on modified B-4 medium (pH  
236 7.0) composed of: yeast extract, 4 g/l; calcium acetate, 2.5 g/l; agar, 15 g/l. The plates inoculated  
237 with MM24 and MM99, following incubation at 28°C, were examined under ESEM after 2 months  
238 of incubation for CPA media, and 1 month of incubation for B-4.

239  
240 **CaCO<sub>3</sub> solubilization**  
241 Isolates were tested for their ability to solubilize calcium carbonate on two different media  
242 including i) minimal medium (MM) (Kieser et al. 2000) containing CaCO<sub>3</sub> (2 g/l), supplemented  
243 or not with glucose (5 g/l), and ii) 1:100 diluted nutrient agar (Portillo et al. 2009), containing  
244 CaCO<sub>3</sub> (2.5 g/l), supplemented or not with glucose (2 g/l). The spot-inoculated plates were  
245 incubated for 4 weeks at 28°C and the capability of calcium carbonate solubilization was confirmed  
246 by observation of the clear halo around a colony.

## 247 248 **Results and Discussion**

### 249 **Microscopic evaluation of indigenous moonmilk filamentous bacteria as nucleation sites for** 250 **carbonate precipitation**

251 Filamentous bacteria, particularly Actinobacteria, have been proposed to participate in the  
252 genesis of moonmilk deposits by serving as nucleation sites for carbonate deposition (Cañaveras  
253 et al. 2006). Regardless the fixation procedure (glutaraldehyde, ethanol, and freeze-drying),

254 classical SEM observations revealed the same crystal morphologies that have also been described  
255 in the literature (data not shown) (Cañaveras et al. 1999; Cañaveras et al. 2006; Bindschedler et al.  
256 2010; Bindschedler et al. 2014). The surface of moonmilk samples revealed the presence of dense,  
257 unstructured meshes of micrometer-size filaments known as needle-fiber calcite (Fig. 2a), which,  
258 based on EDS analysis, were shown to be mainly composed of calcium, carbon and oxygen  
259 (supplementary Fig. 3a). The structure of moonmilk deposits was characterized by the presence of  
260 abundant, randomly oriented, monocrystalline rods and polycrystalline fibers composed of stacked  
261 rhombohedra (Fig. 2a). Those crystals showed variable dimensions, ranging from 0.5 – 1  $\mu\text{m}$  width  
262 and 30 - 100  $\mu\text{m}$  length for monocrystals, and 2 - 20  $\mu\text{m}$  width, 10 - 100  $\mu\text{m}$  length for polycrystals,  
263 as previously reported (Cañaveras et al. 1999). Interestingly, we observed within the moonmilk  
264 microscopic composition, abundant networks of filaments with nano-sized width (50 - 150 nm),  
265 which either formed compacted pellets (Fig. 2b) or mats (Fig. 2c). The organized networks of nano-  
266 fibers, similar to the one observed in Fig. 2c, were previously reported from moonmilk and  
267 associated with fungal wall polymers (Bindschedler et al. 2010; Bindschedler et al. 2014).  
268 However, randomly-oriented, compacted pellets of nano-fibers as presented on Fig. 2b, were highly  
269 comparable to Actinobacteria, but characterized by a much smaller cell size which could be a result  
270 of the oligotrophic nature of the cave environment. It has been demonstrated that the cell size is  
271 largely dependent on the nutritional status of the environment, with resource-poor ecosystems  
272 stimulating dwarfism (Young 2006; Portillo et al. 2013). In this work, the observed size of the  
273 putative bacterial nano-filaments, ranging from 0.05 to 0.15  $\mu\text{m}$ , could also be a consequence of  
274 the oligotrophic nature of the moonmilk niche as cell elongation/filamentation has been shown to  
275 be the result of nutritional stress in some bacteria (Steinberger et al. 2002), including Actinobacteria  
276 (Pine and Boone 1967; Wills and Chan 1978; Deutch and Perera 1992). However, even in nutrient-  
277 rich soils the majority of bacteria can display a diameter less than 0.2  $\mu\text{m}$  (Hahn 2004). In addition,



278 the imprints of nano-sized microorganisms were already reported from other geological formations,  
279 such as sedimentary rocks (Folk and Chafetz 2000; Folk 1993). Finally, recent findings of ultra-  
280 small marine Actinobacteria with an average diameter of about 0.3  $\mu\text{m}$ , provides an additional  
281 evidence for the existence of nano-bacteria in oligotrophic ecosystems (Ghai et al. 2013). Unlike  
282 crystal fibers, the tiny filaments observed in glutaraldehyde- and ethanol-fixed samples, were not  
283 completely straight and regular in their shape but rather displayed plasticity and were often curved,  
284 either without preferential orientation (Fig. 2b) or in the same direction (Fig. 2d/e). The tiny, curved  
285 filaments were not observed - probably not preserved - in freeze-dried samples that suffered of ice  
286 crystal growth (data not shown). One-directional growth is not a typical behavior of growing  
287 actinobacterial filaments that are commonly branching in diverse directions in order to form a  
288 complex mycelial network. This rigid and unidirectional growth might suggest that they represent  
289 calcified filaments potentially still actively growing at their tip, which remains curved (Fig. 2d).  
290 Elemental analysis performed with EDS revealed that the observed nano-size filaments contained  
291 higher content of carbon and oxygen in comparison to the surrounding crystals, suggesting a  
292 possible biological origin (supplementary Fig. 3b). However, these EDS analyses should be viewed  
293 with great prudence as the difference in the elemental compositions between filaments and crystals  
294 could simply be a consequence of the structure and not the nature (organic vs mineral) of the  
295 analyzed areas. Additionally, along (Fig. 2f) or on the tip (Fig. 2g) of some filaments, a possible  
296 initiation of calcium carbonate deposition was observed. Besides nano-sized filaments, reticulated  
297 filaments were sporadically observed within moonmilk crystals (Fig. 2h). Those particular  
298 filamentous forms, with the size of about 0.5  $\mu\text{m}$  width and up to 75  $\mu\text{m}$  length, are often found in  
299 subsurface environment, including limestone or lava caves, and possess higher carbon content than  
300 the one typically observed for calcite minerals, suggesting their biogenic origin. However, the  
301 associated microorganisms are not yet identified (Melim et al. 2008; Northup et al. 2011; Miller et

302 al. 2012; Melim et al. 2015). Overall, these observations tend to confirm the hypothesis of  
303 filamentous microorganisms (bacteria and fungi) serving as a nucleation sites for moonmilk  
304 mineral deposition (Cañaveras et al. 2006; Bindschedler et al. 2010; Bindschedler et al. 2014).

305

### 306 **Potential role of cultivable moonmilk-derived *Streptomyces* in carbonate precipitation**

307 A nucleation site itself is not sufficient to promote CaCO<sub>3</sub> precipitation, as dead bacterial  
308 cells lose the ability to precipitate minerals (Banks et al. 2010). The dominant role of bacteria in  
309 calcification is attributed to metabolic activities which increase the pH of the environment (above  
310 pH 8) and therefore favor a shift of the CO<sub>2</sub> – HCO<sub>3</sub><sup>-</sup> – CO<sub>3</sub><sup>2-</sup> equilibrium towards carbonate ions  
311 which precipitate with Ca<sup>2+</sup> ions. We screened 31 representative *Streptomyces* strains isolated from  
312 moonmilk (see supplementary Fig. 2 retrieved from Maciejewska et al. 2016) for their metabolic  
313 activities that could lead to a raise in pH, including ureolysis, peptides/amino acids ammonification,  
314 and dissimilatory nitrate/nitrite reduction to ammonia (Fig. 1). Although these assays were  
315 performed under laboratory conditions, a qualitative assessment of these processes allowed ranking  
316 the tested phylotype representatives according to their metabolic performance, and therefore their  
317 potential to drive biomineralization through an increase in the extracellular pH. The results are  
318 shown in Fig. 3, along with a compilation of activities and phylogenetic relationships (Fig. 4). The  
319 results of each metabolic activity assay for all the tested strains are presented in supplementary Fig.  
320 4.

321

### 322 **Ureolysis**

323           Among the 31 isolates tested, 15 showed an ability to increase the pH by hydrolysis of urea  
324 (Fig. 4). MM99 and MM122 were the strongest ureolytic strains, with comparable metabolic  
325 performance to the positive control strain - *Klebsiella pneumoniae* ATCC 13883 (Fig. 3a and  
326 supplementary Fig. 4a). The majority of urease-positive moonmilk isolates displayed weak and  
327 moderate activities, which were observed either within 3 days of incubation (5 strains) or after  
328 extended time (more than 1 week) (6 strains) (Fig. 3a and supplementary Fig. 4a).

329           In order to know if a relation could be established between the assessed *in vitro* activity and  
330 the genetic predispositions for ureolysis, we examined the genomes of the phylotype  
331 representatives for the presence of urease genes. We used HMM profiles constructed from Clusters  
332 of Orthologous Groups (COGs) of proteins of the urease structural subunits  
333 (UreA/UreB/Ure(AB)/UreC), as well as the accessory proteins (UreF/UreG/UreD). The  
334 corresponding genes originate from functional clusters of three types *i.e.*, *ureABCFGD*, *ure(AB)C*,  
335 and *ure(AB)CFGD*, which are all present in the urease-positive species. The large majority of  
336 moonmilk strains (90%) was found to encode all the urease genes, in some cases present in several  
337 copies (Table 1), suggesting that even the strains displaying urease-negative phenotypes are  
338 capable of urease activity. This suggests that in urease-negative strains urease activity is not  
339 expressed under the conditions tested, or that they harbor mutations that prevent expression or  
340 activity. Nonetheless, urea transport appears to be functional in all urease-negative isolates as urea  
341 exerted a toxic effect in the growth media of these strains (an effect that could be reversed by  
342 growth in the same medium lacking urea; data not shown).

343           Urease activity has been recently linked to an activity of the zinc-containing enzyme –  
344 carbonic anhydrase (CA) (Achal and Pan 2011). While urease maintains an alkaline environment  
345 by generating ammonia, carbonic anhydrase would provide carbon dioxide for biomineralization

346 through dehydration of carbonic acid ( $\text{H}_2\text{CO}_3$ ) also produced during ureolysis (Fig. 1). It was  
347 recently demonstrated that the activities of CA and urease were correlated along the bacterial  
348 growth and corresponded to maximum calcite production (Banks et al. 2010; Achal and Pan 2011),  
349 while inhibition of carbonic anhydrase activity decreased the rate of calcification, with calcite  
350 precipitation occurring more efficiently with the synergistic action of both enzymes – CA and  
351 urease (Dhami et al. 2014).

352 The presence of this highly efficient enzyme in cave settings was previously confirmed  
353 through metagenomic study of a speleothem in Tjuv-Ante's Cave (Sweden) (Mendoza et al. 2016),  
354 and highly acidic cave biofilms, known as 'snottites' (Jones et al. 2011). However, it has never  
355 been directly associated to a specific taxonomic group through genome-based approach. The only  
356 link was suggested by Cuezva et al. (2012), who proposed CA to be responsible for  $\text{CO}_2$   
357 sequestration by grey spot colonization found on the walls of Altamira cave, which were dominated  
358 by Actinobacteria.

359 Evaluation of the genomes of moonmilk phylotypes for the presence of  $\beta$ -CA (Smith and  
360 Ferry 2000), together with the sulfate transporter family protein in cluster with CA (SulP-type  
361 permease) revealed that all the investigated strains encode at least one copy of carbonic anhydrase  
362 (100% strains encoded  $\beta$ -CA (1) and 87%  $\beta$ -CA (2)) and 90% of them possessing sulfate  
363 transporter (Table 1). High copy number of this intracellular zinc metalloenzyme, reaching up to 7  
364 copies in MM17, revealed their ubiquitous distribution among karstic bacteria, and suggests their  
365 applications in multiple and essential cellular processes beyond their presumed role in carbonate  
366 precipitation. Interestingly, a high representation of sulfate permeases of SulP family was also  
367 characteristic for the studied population. These broad specificity inorganic anion transporters were  
368 suggested to assist bicarbonate ( $\text{HCO}_3^-$ ) transport (Felce and Saier 2005), which was

369 experimentally confirmed in marine cyanobacteria (Price et al. 2004). While in cyanobacteria SulP  
370 transporter mediates  $\text{HCO}_3^-/\text{Na}^{2+}$  symport, the substrate specificity in the case of *Streptomyces* is  
371 highly speculative. Nevertheless, fusion of this protein with carbonic anhydrases indeed strongly  
372 suggests its participation in  $\text{HCO}_3^-$  transport. However, whether it is an importer or exporter  
373 remains an open question. It could be possible that  $\text{HCO}_3^-$  uptake through SulP increases the  
374 intracellular pool of this inorganic carbon species, which potentially might be efficiently  
375 transformed into carbon dioxide by carbonic anhydrases, and be exported outside the cell, unless  
376 required for cellular metabolism. Alternatively, SulP-dependent export of intracellularly formed  
377  $\text{HCO}_3^-$  through CA-mediated hydration of carbon dioxide, would be assisted with import of other  
378 ions (Fig. 1). Altogether, these findings reveal abundant distribution of genes involved in the  
379 inorganic ionic transport and metabolism, which might be related to the biomineralization  
380 phenomenon.

381

## 382 **Ammonification**

383 Moonmilk *Streptomyces* were also evaluated for their ability to raise the pH through peptide/amino  
384 acid mineralization. 94 % of tested strains efficiently decomposed nitrogenous compounds into  
385 ammonia (Fig. 1, Fig. 3b, Fig. 4 and supplementary Fig. 4b). The majority displayed a strong  
386 metabolic phenotype (Fig. 5), which is unsurprising given that *Streptomyces* are well known  
387 ammonifying bacteria in soils, where they actively participate in the decomposition of organic  
388 matter (Prakash et al. 2012). In the isolated cave environment, with limited organic matter input  
389 from the surface, the source of such macromolecules is unclear, although peptides and amino acids  
390 might be entering the cave through water that has percolated through the soil, making such

391 molecules more readily available than urea (Northup and Lavoie 2001). Amino acid/peptide  
392 ammonification was found to be more widespread among the moonmilk isolates than ureolysis,  
393 supporting this hypothesis.

394

### 395 **Dissimilatory nitrate reduction to ammonium**

396 Dissimilatory nitrate reduction to ammonium (DNRA) is another nitrogen cycle-related process  
397 considered to be involved in calcification (Castanier et al. 2000) (Fig. 1). This pathway operates in  
398 oxygen-limited environments, which could be encountered in the inner layers of the moonmilk  
399 deposits. Moreover, moonmilk develops alongside dripping water and its often pasty structure can  
400 become fluid, based on its water content, which can drastically reduce oxygen availability.  
401 Although *Streptomyces* are obligate aerobes, they are genetically capable of survival under oxygen-  
402 limited conditions, encoding genes related to anaerobic respiration, the so-called “anaerobic  
403 paradox” (Borodina et al. 2005). Indeed, the model species *Streptomyces coelicolor* was reported  
404 to anaerobically respire nitrate (Fischer et al. 2010; Fischer et al. 2014). Though nitrite, the product  
405 of this process, was not reduced to ammonia, but detoxified through extrusion via  $\text{NO}_3^-/\text{NO}_2^-$   
406 antiporter system (Fischer et al. 2010; Fischer et al. 2012). In *S. coelicolor* the NirBD reductase  
407 was demonstrated to participate in nitrogen assimilation; however a *nirBD* null-mutant grown in  
408 the presence of nitrite and excess ammonium was still able to reduce nitrite suggesting the activity  
409 of an alternative and yet unknown enzyme (Fischer et al. 2012). We therefore questioned whether  
410 moonmilk isolates would be able to mediate DNRA and reduce nitrate and nitrite under oxygen-  
411 limited conditions. For this purpose, we incubated each strain in static (without agitation) liquid  
412 culture conditions to limit oxygen availability. Overall, 68% and 77% of strains revealed a capacity

413 to reduce either nitrate ( $\text{NO}_3^-$ ) or nitrite ( $\text{NO}_2^-$ ), respectively, with 52% able to reduce both nitrate  
414 and nitrite (Fig. 3c/d, Fig. 4 and Fig. 5). No  $\text{N}_2$  gas production was observed, excluding  
415 denitrification, which has been only rarely reported for *Streptomyces* (Albrecht et al. 1997; Shoun  
416 et al. 1998; Kumon et al. 2002). The lack of  $\text{N}_2$  generation would suggest a complete reduction of  
417 nitrate/nitrite to ammonia via dissimilatory nitrate reduction. Ammonia produced by this pathway,  
418 unless not incorporated by other bacteria or oxidized to other nitrogenous compounds, might  
419 alkalize the extracellular environment and thus stimulate  $\text{CaCO}_3$  precipitation (Fig. 1). In order  
420 to evaluate the presence of a DNRA pathway in moonmilk isolates we screened their genomes for  
421 the presence of genes coding for respiratory nitrate reductases (*narGHJI*) and their associated  
422 NarK-type nitrate/nitrite transporter - NarK2 (Fig. 1). While 40% of moonmilk strains encoded  
423 NarK2 transporter, 30% of them possessed the respiratory nitrate reductases genes (*narGHJI*), with  
424 isolates MM7, MM10, MM48, MM106, MM109, MM111, encoding a complete *nar* cluster (Table  
425 1). Most of those strains were found to be among the strongest nitrate reducers under oxygen-  
426 limited conditions (Fig. 4). The fact that only a minority of the moonmilk *Streptomyces* possessed  
427 the genetic material to perform the first step of DNRA, while a majority (68%) was able to reduce  
428 nitrate, suggests that another nitrate reduction pathway was operating under the condition tested.  
429 This alternative pathway is most likely the  $\text{NO}_3^-$  and  $\text{NO}_2^-$  assimilatory process that uses nitrate  
430 and nitrite as nutrient sources through assimilatory *nasA* (nitrate reductase) and *nirBD* (nitrite  
431 reductase) genes, with the assistance of additional NarK-type  $\text{NO}_3^-$  transporter (Tiffert et al. 2008;  
432 Amin et al. 2012; Fischer et al. 2012). Assimilatory reduction of nitrate and nitrite to ammonium  
433 is highly plausible as 93% of moonmilk strains possess *nasA*, *nirBD*, and *narK*  $\text{NO}_3^-$  importer genes  
434 (Table 1). When monitored on solid medium and thus without oxygen limitation, 68% and 77% of  
435 the tested strains were able to reduce nitrate and nitrite, respectively (supplementary Fig. 4c/d),  
436 which confirmed the high potential of moonmilk *Streptomyces* to use nitrate and nitrite as a

437 nitrogen source, as previously reported for terrestrial *Streptomyces* (Pullan et al. 2011; Fischer et  
438 al. 2012). Altogether, although moonmilk *Streptomyces* possess metabolic ability to reduce nitrate  
439 and nitrite, without production of gas, pointing on ammonia as a final product, we cannot at this  
440 point conclude whether this process represents assimilatory or dissimilatory pathway and whether  
441 DNRA is fully functional.

442

### 443 **Active calcium transport**

444 In addition to processes passively influencing carbonate precipitation, bacteria can also  
445 actively impact this phenomenon, through an active transport of calcium ions. Banks et al. (2010)  
446 suggested that the calcium-toxicity driven removal of this ion outside the bacterial cell is a factor  
447 driving calcification phenotype. Therefore, we have also retrieved through an *in silico* search  
448 ChaA, the  $\text{Ca}^{2+}/2\text{H}^{+}$  antiporter system suggested to be involved in  $\text{CaCO}_3$  deposition (Hammes and  
449 Verstraete 2002; Banks et al. 2010) (Fig. 1). The presence of the *chaA* gene was confirmed for 50%  
450 of moonmilk cultivable phylotypes (Table 1), extending in those strains the calcium-detoxification  
451 system to their spectrum of biomineralization-related processes.

452

### 453 **Production of $\text{CaCO}_3$ deposits by moonmilk *Streptomyces***

454 In order to confirm whether the moonmilk cultivable *Streptomyces* could indeed produce  
455 mineral deposits, we selected two phylotype representatives to be first investigated by polarized  
456 light microscopy then by ESEM in low vacuum mode for the presence of calcium carbonate  
457 precipitates. The selection of strains was based on their predispositions for  $\text{CaCO}_3$  precipitation as  
458 judged by the sum of metabolic performance observed for ureolysis and peptide/amino acid



459 ammonification – the two most significant activities observed for moonmilk *Streptomyces* (Fig. 4).  
460 Strains MM24 and MM99, amongst one of the best isolates based on the metabolic ranking (Fig.  
461 4), were simultaneously cultivated on urea-containing CPA medium for two months, as well as for  
462 one month on the modified B-4 medium commonly used for CaCO<sub>3</sub> precipitation assays. Combined  
463 microscopic observations of bacterial colonies surfaces with BSE and GSE detectors revealed  
464 highly abundant calcite deposits produced by both strains in both media tested (Fig. 6 and Fig. 7).  
465 Ureolysis-mediated mineral precipitation was confirmed by the lack of any calcite in urea-deficient  
466 CPA medium for both isolates (data not shown). All the produced mineral deposits appeared bright  
467 under polarized light (data not shown). The morphology of the calcite polymorphs was comparable  
468 between the isolates, however differed between the two culture conditions. On BSE-images,  
469 bacterial colonies grown in CPA medium showed a rocky surface with discoidal- or oval-shaped  
470 structures of variable diameter that were almost completely encrusting microbial colonies (Fig.  
471 6a/c). The mineral nature of the deposits was confirmed through their high (white) contrast on  
472 BSE-images compared to the surrounding dark organic matter of the colonies (Fig. 6a/c). In  
473 addition, their CaCO<sub>3</sub> mineral composition was confirmed by the elemental X-ray analyses  
474 (supplementary Fig. 5) and elemental mapping (Fig. 6b/d). Calcium, carbon and oxygen were  
475 present roughly in stoichiometric proportion of CaCO<sub>3</sub> in the spectra (supplementary Fig. 5), and  
476 the distribution of those elements was clearly visualized on the mapping (Fig. 6b/d). The presence  
477 of calcium was associated with CaCO<sub>3</sub> minerals, while higher proportion of carbon was associated  
478 with organic colony biomass (Fig. 6b/d). Interestingly, just on the mineral surface, dense webs of  
479 nano-sized filaments were observed (Fig. 7a-e). On high resolution BSE-images, they appeared  
480 either as dark curved filaments at the mineral surface or in the middle of mineralized wrinkles  
481 suggesting that bacteria produced minerals in which they got progressively entombed (Fig. 7a-d).  
482 The filaments free of mineral were also clearly seen interconnecting together and connecting

483 adjacent mineral deposits (Fig. 7e). While on the CPA medium both strains prolifically produced  
484 relatively small-sized calcite polymorphs (up to 100  $\mu\text{m}$ ) (Fig. 6a/c), on the B-4 medium the  
485 observed precipitates although being more scarce, were much larger (up to 400  $\mu\text{m}$ ) (Fig. 6e/g).  
486 The inorganic nature of the larger  $\text{CaCO}_3$  deposits (Fig. 6e/g) were confirmed by X-ray elemental  
487 spectra (supplementary Fig. 5) and elemental mapping (Fig. 6f/h), which clearly distinguished  
488  $\text{CaCO}_3$  minerals from the surrounding bacterial biomass rich in carbon and oxygen. On BSE-image  
489 (Fig. 7f) and under polarized light (data not shown), tiny  $\text{CaCO}_3$  deposits were also detected along  
490 randomly distributed bacterial filaments. Additionally, unlike in CPA medium where the mineral  
491 surface was rather irregular and unstructured, mineral produced by both strains in B-4 showed  
492 morphologically distinct areas, either with a smooth, radiating texture (Fig. 7h), with visible  
493 filamentous imprints (Fig. 7j) or wrinkles (Fig. 7g), that presumably corresponded to bacterial  
494 nano-sized filaments.

#### 495 **Potential role of cultivable moonmilk-derived *Streptomyces* in carbonate dissolution**

496 In addition to constructive processes, bacteria are also believed to induce cave bedrock  
497 dissolution. As oppose to precipitation, a dissolution phenomenon is related to the acidification of  
498 the bacterial microenvironment, most likely as a result of organic acid production, which are the  
499 by-products of microbial carbon metabolism. The presence of detectable levels of organic acids in  
500 cave environment was previously demonstrated by *in situ* analysis via ATR-FTIR spectroscopy  
501 (Bullen et al. 2008). Released organic acids are able to bind cations such as  $\text{Ca}^{2+}$  and liberate  
502 carbonates, which can be subsequently re-precipitated to form cave secondary deposits or be used  
503 by bacteria. Therefore, we have tested the 31 phylotypes for their ability to decrease the pH of the  
504 medium through oxidative degradation of glucose based on the standardized  
505 oxidative/fermentative test (Hugh and Leifson 1953). Over 68% of isolates were found to induce

506 media acidification by this pathway, which was observed as yellow color to transparent halo  
507 development around the inoculum (Fig. 8a and Fig. 9). Among them, 52% of the *Streptomyces*  
508 strains exhibited either good or strong oxidative glucose respiration abilities, strongly reducing the  
509 extracellular pH (Fig. 5, Fig. 9 and supplementary Fig. 6).

510 We have further tested solubilization abilities related to carbon metabolism by cultivating  
511 the phlotypes in calcium carbonate containing media – either in minimal medium or in diluted  
512 nutrient agar - supplemented or not with glucose. The clear effect of glucose breakdown was  
513 observed in diluted nutrient agar in which the supplementation with the carbohydrate induced  
514 CaCO<sub>3</sub> dissolution in 26% of the isolates, while none of the phlotypes promoted dissolution in  
515 the non-supplemented medium (Fig. 8b and Fig. 9). In the non-supplemented nutrient agar, rich in  
516 organic nitrogen source, the cellular energy comes from amino acid utilization, releasing ammonia  
517 as the by-product (Fig. 1), which increases the pH of the medium and thus promotes precipitation  
518 rather than dissolution. The addition of glucose clearly induces the opposite effect but only in a  
519 minority of the isolates which suggests the preference towards amino acids as carbon source over  
520 glucose in the large majority of the studied strains (Fig. 8b and Fig. 9). On the contrary, when  
521 assays were performed in the minimal medium, CaCO<sub>3</sub> dissolution was instead rather inhibited by  
522 the exogenous supply of glucose, as only 29% of isolates showed ability to solubilize CaCO<sub>3</sub> under  
523 this condition, while in minimal media without glucose supply the dissolution phenotype was  
524 characteristic for 81% of isolates (Fig. 8c and Fig. 9). This might be probably related to the fact  
525 that in minimal medium not supplemented with glucose the only carbon source constitutes the  
526 carbonate/bicarbonate from CaCO<sub>3</sub>, which is probably efficiently scavenged by cave-dwelling  
527 bacteria for autotrophic growth resulting in the high dissolution rate observed under this condition.  
528 Although *Streptomyces* are mainly heterotrophic microorganisms, autotrophic growth using CO or

529 CO<sub>2</sub> as a sole carbon source within members of this genus has already been reported (Kim et al.  
530 1998; Gadkari et al. 1990). The identification of a high number of carbonic anhydrases together  
531 with SulP transporters among moonmilk *Streptomyces* (Table 1) could propose a mechanism via  
532 which extracellular bicarbonate would be incorporated into the cell and subsequently converted to  
533 CO<sub>2</sub> (Figure 1). In the moonmilk niche that is deprived of organic carbon, the uptake of inorganic  
534 carbon could thus be a possible scenario, which would primarily promote CaCO<sub>3</sub> precipitation, and  
535 in a second step would lead to CaCO<sub>3</sub> dissolution, as a result of organic acids excretion. The  
536 availability of glucose also induces a dissolution phenotype via release of organic acids from  
537 glucose breakdown, however only in 3 out of the 31 strains tested. This indicates that, although  
538 carbohydrate metabolism might somehow play a role in rock weathering, it is probably not the only  
539 operating system leading to this phenomenon, particularly in carbon-limited cave environment,  
540 where the source of carbon might be the rock itself.

## 541 Discussion 542 Conclusions

542 If Actinobacteria really participate in the genesis of moonmilk deposits which metabolic  
543 activities would potentially be involved? This was the main question addressed in our study which  
544 used a collection of *Streptomyces* strains isolated from moonmilk in order to provide metabolic and  
545 genetic evidences of their presumed role in mediating the formation of these speleothems.  
546 Metabolic profiling revealed that all of the isolated *Streptomyces* possessed the capacity to promote  
547 calcification through at least one pathway involved in biomineralization. Ammonification of  
548 peptides/amino acids was found to be the most widespread and the strongest activity. This could  
549 be in agreement with the fact that peptides and amino acids can constitute self-sustainable sources  
550 of carbon and nitrogen for bacteria and thus support growth of microbial populations irrespectively  
551 of allochthonous nutrient input. Interestingly, genome mining extended the possible spectrum of  
552 metabolic capacities as it revealed the presence of additional pathways in each phylotype involved  
553 in biomineralization processes, either related to CO<sub>2</sub> hydration or active transport of calcium ions.  
554 These findings, supported by microscopy observations of bacteria-like filaments in moonmilk  
555 deposits and crystals produced by individual moonmilk-originating bacteria, confirm its biogenic  
556 origin and the importance of filamentous Actinobacteria in its genesis. However, the metabolic  
557 activities evaluated *in vitro* were not always directly related to the genetic predisposition of  
558 individual strains as some isolates with great genetic potential remained metabolically silent. This  
559 may suggest that they were grown under conditions too different from those encountered in their  
560 original niche to trigger the investigated activity or that specific environmental cues are required  
561 for their activation. Consequently, whether those processes are indeed active *in situ* also remains  
562 an open question. Additionally, our collection of moonmilk Actinobacteria, though being the most  
563 significant population from these speleothems generated so far, does not include the large majority

564 of endemic representatives which are viable but not cultivable A metaproteomic analysis of  
565 proteins extracted from moonmilk deposits is most likely the only approach that would accurately  
566 identify the strains that importantly participate in carbonatogenesis and the metabolic pathways  
567 involved. This approach is currently under investigation.

568

## 569 **Acknowledgments**

570 MM and LM work is supported by a Research Foundation for Industry and Agriculture (FRIA)  
571 grant. AN work is supported by a First Spin-off grant from the Walloon Region (Grant number:  
572 1510530; FSO AntiPred). Computational resources (“durandal” grid computer) were funded by  
573 three grants from the University of Liège, “Fonds spéciaux pour la recherche,” “Crédit de  
574 démarrage 2012” (SFRD-12/03 and SFRD-12/04) and “Crédit classique 2014” (C-14/73) and by a  
575 grant from the F.R.S.-FNRS “Crédit de recherche 2014” (CDR J.0080.15). This work is supported  
576 in part by the Belgian program of Interuniversity Attraction Poles initiated by the Federal Office  
577 for Scientific Technical and Cultural Affairs (PAI no. P7/44). The authors thanks Isabelle Habsch  
578 for microscopy sample preparation and the Centre of Aid for Research and Education in  
579 Microscopy (CAREm-ULg) for giving access to SEM-equipment. SR and MH are Research  
580 Associates at Belgian Fund for Scientific Research (F.R.S-FNRS).

## 581 **Conflict of interest**

582 The authors declare that they have no conflict of interest.

## 583 **Figure captions**

584 **Fig. 1 Heterotrophic pathways associated with carbonatogenesis presumed to occur in**  
585 ***Streptomyces* species.** Microbially mediated carbonate precipitation might be either linked to  
586 active transport of calcium ions across cellular membrane through  $\text{Ca}^{2+}/2\text{H}^{+}$  antiporter system –  
587 ChaA, or to nitrogen cycle-related pathways – ureolysis, ammonification and dissimilatory  
588 reduction of nitrate to ammonium/ammonia (DNRA). All those pathways lead to alkalization of  
589 the bacterial environment through the generation of ammonium, shifting the equilibrium towards  
590 carbonate/bicarbonate ions, which, upon the presence of calcium, precipitate as calcium carbonate  
591 ( $\text{CaCO}_3$ ). ChaA, apart from providing calcium ions for potential precipitation, locally increase pH  
592 through simultaneous incorporation of protons. The urease activity seems to be linked with  
593 cytoplasmic carbonic anhydrases ( $\beta$ -CA), which catalyze dehydration of carbonic acid produced  
594 during ureolysis into carbon dioxide that can constitute an additional source of bicarbonate ions for  
595 precipitation. The export or import of bicarbonate ions could be potentially mediated via the sulfate  
596 transporter family protein in cluster with CA (SulP-type permease). Assimilation of organic  
597 nitrogen from amino acids releases extracellular ammonia through deamination, once the metabolic  
598 demand for nitrogen is fulfilled. The inorganic nitrogen source ( $\text{NO}_3^-$ ), which is imported in  
599 *Streptomyces* by Nark-type transporters, can participate into biomineralization exclusively through  
600 dissimilatory reduction to ammonia mediated by respiratory nitrate reductases (Nar) together with  
601 potential nitrite reductases (Nir), which would be functional under dissimilatory conditions.  
602 Reduction of nitrite to ammonia in streptomycetes was found to operate through assimilatory  
603 pathway catalyzed by NasA and NirBD reductases

604

605 **Fig. 2 SEM-images of nano-size filaments found in the crystal structure of moonmilk deposits**  
606 **from the cave “Grotte des Collemboles” (Comblain-au-Pont, Belgium).** Among typical  
607 moonmilk monocrystalline rods and polycrystalline fibers indicated by white arrows (**a**), dense  
608 meshes of tiny filaments were observed, which were compacted into the stacked pellets (**b**) or dense  
609 biofilms (**c**), mostly randomly orientated, but occasionally one-way directed (**d, e**). Along (**f**) or on  
610 the tip (**g**) of some of those filaments, calcium carbonate deposition was identified, with some of  
611 the filaments presenting reticulated morphology (**h**) as indicated by arrows

612 **Fig. 3 Precipitation-related metabolic activities of the moonmilk *Streptomyces*.** (**a**) Ureolysis.  
613 (**b**) Ammonification. (**c**) Nitrate reduction. (**d**) Nitrite reduction. *Klebsiella pneumoniae* ATCC  
614 13883 (KP), *Citrobacter freundii* ATCC 43864 (CF), *Escherichia coli* ATCC 25922 (EC) and  
615 *Pseudomonas aeruginosa* ATCC 27853 (PA) were used as positive controls for ureolysis,  
616 ammonification, nitrate and nitrite reduction tests, respectively. The observed activities are  
617 visualized for representative strains demonstrating different metabolic performance for each  
618 activity tested, designated through the symbols: (-) lack, (+/-) weak, (+) moderate, (++) good, and  
619 (+++) strong

620  
621 **Fig. 4 The global pattern of carbonate precipitation-associated metabolic activities of**  
622 **moonmilk *Streptomyces*.** The heatmap plot representing metabolic performance of moonmilk  
623 *Streptomyces* strains indicated by color scale, correlated with their MLSA-based phylogenetic  
624 classification (Maciejewska et al. 2016). The total value represents the sum of metabolic  
625 performance observed for ureolysis and amino acids ammonification, ranking the isolates  
626 according to their metabolic predispositions for calcium carbonate precipitation for the tested  
627 activities. The metabolic performance of nitrate/nitrite reduction test was not included into the final



628 ranking. Abbreviations: U, ureolysis; A, peptide/amino acid ammonification; T, total sum of  
629 activities for ureolysis and amino acid ammonification;  $\text{NO}_3^-$ , nitrate reduction;  $\text{NO}_2^-$ , nitrite  
630 reduction

631

632 **Fig. 5 Percentage of moonmilk *Streptomyces* displaying carbonatogenesis related activities *in***  
633 ***vitro* within different metabolic categories.** (-) lack, (+/-) weak, (+) moderate, (++) good, and  
634 (+++) strong

635

636 **Fig. 6 Low vacuum-SEM-BSE images (a, c, e, g) and X-ray elemental mappings (b, d, f, h) of**  
637  **$\text{CaCO}_3$  deposits produced by MM24 (a-b, e-f) and MM99 (c-d, g-h) isolates.** Abundant mineral  
638 deposits produced by isolates MM99 (a) and MM24 (c) in CPA medium, nearly encrusting the  
639 whole microbial colony, were morphologically different from less abundant, but much bigger,  
640 mineral polymorphs produced in modified B-4 agar by MM99 (e) and MM24 (g). The observed  
641 precipitates were found to be  $\text{CaCO}_3$  minerals as revealed by elemental spectra (supplementary Fig.  
642 5) and mappings in both media and for both isolates (MM99 (b) and MM24 (d) in CPA, MM99 (f)  
643 and MM24 (h) in modified B-4). The mappings for MM99 and MM24 in B-4 are marked with the  
644 white squares. The mappings are combined images in which detected dominant elements, namely  
645 carbon (C), oxygen (O), and calcium (Ca) are assigned to a defined color

646

647 **Fig. 7 Biogenic signatures within mineral deposits produced by moonmilk-originating**  
648 ***Streptomyces* (LV-SEM-BSE images).** Along with the different morphologies of produced  
649 mineral deposits specific to the culture conditions used, numerous bacterial imprints were  
650 observed. *Streptomyces* filaments were completely incorporated into the produced minerals as  
651 observed for MM99 (a/b), MM24 (c/d/e) in CPA medium, as well as for MM99 (g) and MM24

652 (i/j) in modified B-4 agar. Their mineralization also appeared as wrinkles each containing a  
653 bacterial filament suggesting their progressive encrustation within the mineral (b/e/g, arrows).  
654 Alternatively, non-mineralized microbial filaments were seen interconnecting adjacent mineral  
655 deposits, as detected for MM24 in CPA (c/e, arrows), or possible compacted aggregates of  
656 filaments were observed at the edges of the mineral produced by MM99 in B-4 (h). Initial steps of  
657 mineral deposition were detected along bacterial filaments in modified B-4 culture of isolate  
658 MM99 (f, arrows)

659  
660 **Fig. 8 Dissolution-related metabolic activities of the moonmilk *Streptomyces*.** Metabolic  
661 performance observed for oxidative glucose degradation (a), and calcium carbonate dissolution in  
662 diluted nutrient agar (b) or minimal media (c). *Pseudomonas aeruginosa* ATCC 27853 (PA) was  
663 used as positive control in glucose oxidative assay. The metabolic performance is designated  
664 through the symbols: (-) lack, (+/-) weak, (+) moderate, (++) good, and (+++) strong activity.  
665 Media not supplemented with glucose are in the upper line in panel b and c, while media with  
666 addition of glucose are displayed in the bottom line of the corresponding panels

667  
668 **Fig. 9 The global pattern of carbonate dissolution-associated metabolic activities of moonmilk**  
669 ***Streptomyces*.** The heatmap plot representing metabolic performance of moonmilk *Streptomyces*  
670 strains indicated by color scale, correlated with their MLSA-based phylogenetic classification  
671 (Maciejewska et al. 2016). Abbreviations: O, glucose oxidation; MM, minimal media with CaCO<sub>3</sub>;  
672 MMg, minimal media with CaCO<sub>3</sub> and glucose; NA, diluted nutrient agar with CaCO<sub>3</sub>; NAg,  
673 diluted nutrient agar with CaCO<sub>3</sub> and glucose

674 **Tables**

675 **Table 1.** *In silico* prediction of individual genes putatively involved in the moonmilk  
676 biomineralization process retrieved from moonmilk-originating *Streptomyces* strains, including  
677 genes related to ureolysis (*ure*), nitrate/nitrite transport (*narK*) and reduction (*nar/nas/nir*), carbon  
678 dioxide (CO<sub>2</sub>) hydration (carbonic anhydrase - CA), and active transport of calcium ions through  
679 Ca<sup>2+</sup>/2H<sup>+</sup> antiporter system (*chaA*).

| strain | Ureolysis   |             |              |             |             |             |             | NO <sub>3</sub> <sup>-</sup> / NO <sub>2</sub> <sup>-</sup> transport |             | Respiratory NO <sub>3</sub> <sup>-</sup> reduction |             |             |              |             | Assimilatory NO <sub>3</sub> <sup>-</sup> reduction | NO <sub>2</sub> <sup>-</sup> reduction |              |             | CO <sub>2</sub> hydration |          |             | Ca <sup>2+</sup> transport |
|--------|-------------|-------------|--------------|-------------|-------------|-------------|-------------|-----------------------------------------------------------------------|-------------|----------------------------------------------------|-------------|-------------|--------------|-------------|-----------------------------------------------------|----------------------------------------|--------------|-------------|---------------------------|----------|-------------|----------------------------|
|        | <i>ureA</i> | <i>ureB</i> | <i>ureAB</i> | <i>ureC</i> | <i>ureF</i> | <i>ureG</i> | <i>ureD</i> | <i>narK2</i>                                                          | <i>narK</i> | <i>narG</i>                                        | <i>narH</i> | <i>narJ</i> | <i>narJ2</i> | <i>narI</i> | <i>nasA</i>                                         | <i>nirB1</i>                           | <i>nirB2</i> | <i>nirD</i> | β-CA (1)                  | β-CA (2) | <i>sulP</i> | <i>chaA</i>                |
| MM1    | 1           | 1           | 2            | 3           | 1           | 1           | 2           | -                                                                     | +           | -                                                  | -           | -           | -            | 1           | 1                                                   | 1                                      | 1            | 2           | 1                         | 1        | -           |                            |
| MM3    | 1           | 1           | 2            | 3           | 2           | 2           | 3           | -                                                                     | +           | -                                                  | -           | -           | -            | 1           | 1                                                   | 1                                      | 1            | 2           | 1                         | 1        | -           |                            |
| MM5    | 1           | 1           | 2            | 3           | 2           | 2           | 2           | -                                                                     | +           | -                                                  | -           | -           | -            | 1           | 1                                                   | 1                                      | 1            | 3           | 3                         | 1        | 1           |                            |
| MM6    | 1           | 1           | 1            | 3           | 1           | 1           | 1           | -                                                                     | +           | -                                                  | -           | -           | -            | 1           | 1                                                   | 2                                      | 2            | 4           | -                         | 1        | 1           |                            |
| MM7    | 2           | 2           | 2            | 3           | 2           | 2           | 2           | +                                                                     | +           | 1                                                  | 1           | -           | 1            | 1           | 1                                                   | 1                                      | 1            | 1           | 1                         | 1        | -           |                            |
| MM10   | 1           | 1           | 1            | 2           | 2           | 2           | 2           | +                                                                     | +           | 3                                                  | 2           | 1           | 1            | 2           | 1                                                   | 1                                      | 1            | 2           | 1                         | 1        | -           |                            |
| MM12   | 1           | 1           | 2            | 3           | 3           | 3           | 3           | -                                                                     | +           | -                                                  | -           | -           | -            | 1           | 1                                                   | 1                                      | 1            | 2           | 2                         | -        | 1           |                            |
| MM13   | 1           | 1           | 1            | 2           | 2           | 2           | 2           | +                                                                     | +           | 1                                                  | -           | -           | -            | 1           | 1                                                   | 1                                      | 1            | 2           | 1                         | 1        | 1           |                            |
| MM14   | 1           | 1           | 2            | 3           | 2           | 2           | 2           | -                                                                     | +           | -                                                  | 1           | -           | 1            | 1           | 1                                                   | 1                                      | 1            | 1           | 2                         | 1        | -           |                            |
| MM17   | 1           | 1           | 3            | 3           | 2           | 2           | 2           | -                                                                     | +           | 1                                                  | -           | -           | -            | 1           | 1                                                   | 1                                      | 1            | 6           | 1                         | 1        | 1           |                            |
| MM19   | 1           | 1           | 1            | 2           | 1           | 1           | 1           | -                                                                     | +           | -                                                  | -           | -           | -            | 1           | 1                                                   | 1                                      | 1            | 1           | 1                         | 1        | -           |                            |
| MM21   | 1           | 1           | 2            | 3           | 2           | 2           | 2           | -                                                                     | +           | -                                                  | -           | -           | -            | 1           | 1                                                   | 1                                      | 1            | 2           | 1                         | 1        | -           |                            |
| MM23   | 1           | 1           | 2            | 3           | 2           | 2           | 2           | -                                                                     | +           | -                                                  | -           | -           | -            | 1           | 1                                                   | 1                                      | 1            | 1           | 1                         | 1        | -           |                            |
| MM24   | 2           | 2           | 2            | 5           | 2           | 2           | 4           | +                                                                     | +           | -                                                  | -           | -           | -            | 1           | 1                                                   | 1                                      | 1            | 2           | 2                         | 1        | 1           |                            |
| MM44   | 1           | 1           | 2            | 3           | 2           | 2           | 2           | -                                                                     | +           | -                                                  | -           | -           | -            | 1           | 1                                                   | 1                                      | 1            | 2           | 1                         | 1        | -           |                            |
| MM48   | 2           | 2           | 2            | 4           | 2           | 2           | 2           | -                                                                     | +           | 1                                                  | 1           | -           | 1            | 2           | 1                                                   | 2                                      | 1            | 5           | 1                         | 1        | 1           |                            |
| MM59   | 1           | 1           | -            | 1           | 1           | 1           | 1           | -                                                                     | +           | -                                                  | -           | -           | -            | 1           | 1                                                   | 1                                      | 1            | 3           | 2                         | 1        | 1           |                            |
| MM68   | 1           | 1           | 1            | 2           | 3           | 2           | 2           | -                                                                     | +           | -                                                  | -           | -           | -            | 1           | 1                                                   | 1                                      | 1            | 2           | 2                         | 1        | 1*          |                            |
| MM99   | 3           | 3           | 1            | 4           | 3           | 3           | 3           | +                                                                     | -           | -                                                  | -           | -           | -            | 1           | -                                                   | -                                      | -            | 1           | 1                         | 1        | -           |                            |
| MM100  | 1           | 1           | 2            | 4           | 2           | 2           | 2           | +                                                                     | +           | -                                                  | -           | -           | -            | 2           | 1                                                   | 1                                      | 1            | 2           | 1                         | -        | -           |                            |
| MM104  | 1           | 1           | 1            | 1           | 1           | 1           | 1           | -                                                                     | +           | -                                                  | -           | -           | -            | -           | 1                                                   | 1                                      | 1            | 2           | 3                         | 1        | 1           |                            |
| MM105  | 1           | 1           | 3            | 4           | 1           | 1           | 1           | +                                                                     | +           | -                                                  | -           | -           | -            | 1           | 1                                                   | 1                                      | 1            | 1           | -                         | 1        | -           |                            |
| MM106  | 2           | 2           | -            | 2           | 2           | 2           | 2           | +                                                                     | +           | 2                                                  | 2           | -           | 2            | 2           | 1                                                   | 1                                      | 1            | 1           | -                         | 1        | 1           |                            |
| MM107  | -           | -           | -            | 1           | -           | -           | -           | -                                                                     | -           | -                                                  | -           | -           | -            | -           | -                                                   | -                                      | -            | 3           | 2                         | 1        | 1           |                            |
| MM108  | 1           | 1           | 3            | 4           | 1           | 1           | 1           | +                                                                     | +           | -                                                  | -           | -           | -            | 2           | 1                                                   | 1                                      | 1            | 3           | 1                         | 1        | 1           |                            |
| MM109  | 1           | 1           | 2            | 3           | 2           | 2           | 2           | +                                                                     | +           | 2                                                  | 1           | -           | 1            | 2           | 1                                                   | 1                                      | 1            | 2           | -                         | 1        | -           |                            |
| MM111  | 2           | 2           | 2            | 4           | 2           | 2           | 2           | -                                                                     | +           | 1                                                  | 1           | -           | 1            | 1           | 1                                                   | 1                                      | 1            | 1           | 1                         | 1        | 1           |                            |
| MM117  | 1           | 1           | 1            | 2           | 1           | 1           | 1           | +                                                                     | +           | -                                                  | -           | -           | -            | 2           | 1                                                   | 1                                      | 1            | 1           | 1                         | 1        | -           |                            |
| MM122  | 2           | 2           | 2            | 4           | 3           | 3           | 3           | +                                                                     | +           | -                                                  | -           | -           | -            | 1           | 1                                                   | 1                                      | 1            | 1           | 3                         | -        | -           |                            |
| MM128  | 1           | 1           | 1            | 2           | 1           | 1           | 1           | -                                                                     | +           | -                                                  | -           | -           | -            | 1           | 1                                                   | 1                                      | 1            | 2           | 2                         | 1        | 1           |                            |

680 Abbreviations: CA\_sulf, sulfate transporter family protein in cluster with carbonic anhydrase; \* pseudogene

## 681 **References**

- 682 Achal V, Pan X (2011) Characterization of urease and carbonic anhydrase producing bacteria and  
683 their role in calcite precipitation. *Curr Microbiol* 62:894–902. doi: 10.1007/s00284-010-9801-  
684 4
- 685 Albrecht A, Ottow JCG, Benckiser G, et al (1997) Incomplete denitrification (NO and N<sub>2</sub>O) from  
686 nitrate by *Streptomyces violaceoruber* and *S. nitrosporeus* revealed by acetylene inhibition  
687 and 15N gas chromatography-quadrupole mass spectrometry analyses. *Naturwissenschaften*  
688 84:145–147.
- 689 Amin R, Reuther J, Bera A, et al (2012) A novel GlnR target gene, *nnaR*, is involved in  
690 nitrate/nitrite assimilation in *Streptomyces coelicolor*. *Microbiology* 158:1172–1182. doi:  
691 10.1099/mic.0.054817-0
- 692 Axenov-Gibanov D V., Voytsekhovskaya I V., Tokovenko BT, et al (2016) Actinobacteria isolated  
693 from an underground lake and moonmilk speleothem from the biggest conglomeratic karstic  
694 cave in Siberia as sources of novel biologically active compounds. *PLoS One* 11(2). doi:  
695 10.1371/journal.pone.0149216
- 696 Banks ED, Taylor NM, Gulley J, et al (2010) Bacterial Calcium Carbonate Precipitation in Cave  
697 Environments: A Function of Calcium Homeostasis. *Geomicrobiol J* 27:444–454. doi:  
698 10.1080/01490450903485136
- 699 Barton HA, Northup DE (2007) Geomicrobiology in cave environments: Past, current and future  
700 perspectives. *J Cave Karst Stud* 69:163–178.
- 701 Baskar S, Baskar R, Routh J (2011) Biogenic Evidences of Moonmilk Deposition in the Mawmluh  
702 Cave, Meghalaya, India. *Geomicrobiol J* 28:252–265. doi:  
703 10.1080/01490451.2010.494096
- Bentley SD, Chater KF, Cerdeño-Tárraga a-M, et al (2002)

- 704 Complete genome sequence of the model actinomycete *Streptomyces coelicolor* A3(2).  
705 Nature 417:141–147. doi: 10.1038/417141a
- 706 Bindschedler S, Cailleau G, Braissant O, et al (2014) Unravelling the enigmatic origin of calcitic  
707 nanofibres in soils and caves: purely physicochemical or biogenic processes? Biogeosciences  
708 2809–2825.
- 709 Bindschedler S, Milliere L, Cailleau G, et al (2010) Calcitic nanofibres in soils and caves: a putative  
710 fungal contribution to carbonatogenesis. Geol Soc London, Spec Publ 336:225–238. doi:  
711 10.1144/SP336.11
- 712 Borodina I, Krabben P, Nielsen J (2005) Genome-scale analysis of *Streptomyces coelicolor* A3(2)  
713 metabolism. Genome Res 15:820–829. doi: 10.1101/gr.3364705
- 714 Borsato A, Frisia S, Jones B, van der Borg K (2000) Calcite moonmilk: crystal morphology and  
715 environment of formation in caves in the italian Alps. J Sediment Res 70:1179–1190. doi:  
716 10.1306/032300701171
- 717 Braissant O, Bindschedler S, Daniels A, et al (2012) Microbiological activities in moonmilk  
718 monitored using isothermal microcalorimetry (Cave of Vers Chez Le Brandt, Neuchatel,  
719 Switzerland). J Cave Karst Stud 74:116–126.
- 720 Bullen H, Oehrle S, Bennett A, et al (2008) Use of Attenuated Total Reflectance Fourier Transform  
721 Infrared Spectroscopy To Identify Microbial Metabolic Products on Carbonate Mineral  
722 Surfaces. Appl Environ Microbiol 74:4553–4559.
- 723 Cacchio P, Ferrini G, Ercole C, Lepidi A (2014) Biogenicity and Characterization of Moonmilk in  
724 the Grotta Nera (Majella National Park, Abruzzi, Central Italy). J Cave Karst Stud 76:88–103.
- 725 Cailleau G, Verrecchia EP, Braissant O, Emmanuel L (2009) The biogenic origin of needle fibre  
726 calcite. Sedimentology 56:1858–1875. doi: 10.1111/j.1365-3091.2009.01060.x
- 727 Cañaveras JC, Cuezva S, Sanchez-Moral S, et al (2006) On the origin of fiber calcite crystals in

- 728 moonmilk deposits. *Naturwissenschaften* 93:27–32. doi: 10.1007/s00114-005-0052-3
- 729 Cañaveras JC, Hoyos Gómez M, Sánchez-Moral S, et al (1999) Microbial Communities Associated  
730 With Hydromagnesite and Needle-Fiber Aragonite Deposits in a Karstic Cave (Altamira,  
731 Northern Spain). *Geomicrobiol J* 16:9–25. doi: 10.1080/014904599270712
- 732 Castanier S, M G Le, Perthuisot J, Le Metayer-Levrel G (2000) Bacterial roles in the precipitation  
733 of carbonate minerals. In: *Microbial sediments*. pp 32–39.
- 734 Cuezva S, Fernandez-Cortes A, Porca E, et al (2012) The biogeochemical role of Actinobacteria  
735 in Altamira Cave, Spain. *FEMS Microbiol Ecol* 81:281–290. doi: 10.1111/j.1574-  
736 6941.2012.01391.x
- 737 Deutch CE, Perera GS (1992) Myceloid cell formation in *Arthrobacter globiformis* during osmotic  
738 stress. *Journal of Applied Bacteriology*, 72:493–499. doi:10.1111/j.1365-  
739 2672.1992.tb01865.x
- 740 Dhami NK, Reddy MS, Mukherjee A (2014) Synergistic role of bacterial urease and carbonic  
741 anhydrase in carbonate mineralization. *Appl Biochem Biotechnol* 172:2552–2561. doi:  
742 10.1007/s12010-013-0694-0
- 743 Eddy S (1998) Profile hidden Markov models. *Bioinformatics* 14:755–763. doi: btb114 [pii]
- 744 Engel AS, Paoletti MG, Beggio M, et al (2013) Comparative microbial community composition  
745 from secondary carbonate (moonmilk) deposits: implications for the *Cansiliella servadeii*  
746 cave hypopetric food web. *Int J Speleol* 42:181–192.
- 747 Felce J, Saier MH (2005) Carbonic anhydrases fused to anion transporters of the SulP family:  
748 Evidence for a novel type of bicarbonate transporter. *J Mol Microbiol Biotechnol* 8:169–176.  
749 doi: 10.1159/000085789
- 750 Fischer M, Alderson J, Van Keulen G, et al (2010) The obligate aerobe *Streptomyces coelicolor*  
751 A3(2) synthesizes three active respiratory nitrate reductases. *Microbiology* 156:3166–3179.

- 752       doi: 10.1099/mic.0.042572-0
- 753   Fischer M, Falke D, Pawlik T, Sawers RG (2014) Oxygen-dependent control of respiratory nitrate  
754       reduction in mycelium of *Streptomyces coelicolor* A3(2). J Bacteriol 196:4152–4162. doi:  
755       10.1128/JB.02202-14
- 756   Fischer M, Schmidt C, Falke D, Sawers RG (2012) Terminal reduction reactions of nitrate and  
757       sulfate assimilation in *Streptomyces coelicolor* A3(2): identification of genes encoding nitrite  
758       and sulfite reductases. Res Microbiol 165:340–348.
- 759   Folk RL (1993) SEM Imaging of Bacteria and Nannobacteria in Carbonate Sediments and Rocks.  
760       Journal of Sedimentary Petrology 63:990–999.
- 761   Folk RL, Chafetz HS (2000) Bacterially Induced Microscale and Nanoscale Carbonate Precipitates.  
762       In: Microbial Sediments. Springer Berlin Heidelberg, pp 40–49.
- 763   Food and Agriculture Organization of the United Nations (1983) A programme of investigations  
764       on the hydrobiology of fish ponds (Microbiological investigations).
- 765   Gadkari D, Schricker K, Acker G, et al (1990) *Streptomyces thermoautotrophicus* sp. nov., a  
766       Thermophilic CO- and H<sub>2</sub>-Oxidizing Obligate Chemolithoautotroph. Appl Environ Microbiol  
767       56:3727–3734.
- 768   Ghai R, Mizuno CM, Picazo A, et al (2013) Metagenomics uncovers a new group of low GC and  
769       ultra-small marine Actinobacteria. Sci. Rep 3:2471. doi:10.1038/srep02471
- 770   Hahn MW (2004) Broad diversity of viable bacteria in ‘sterile’ (0.2 µm) filtered water. Research  
771       in Microbiology 155:688–691.
- 772   Hammad I, Talkhan F, Zoheir A (2013) Urease activity and induction of calcium carbonate  
773       precipitation by *Sporosarcina pasteurii* NCIMB 8841. J Appl Sci Resear 9:1525–1533.
- 774   Hammes F, Verstraete W (2002) Key roles of pH and calcium metabolism in microbial carbonate  
775       precipitation. Rev Environ Sci Biotechnol 1:3–7. doi: 10.1023/A:1015135629155



- 776 Harmon RS, Atkinson T., Atkinson J. (1983) The Mineralogy of Castleguard Cave, Columbia  
777 Icefields, Alberta, Canada. *Arct Alp Res* 15:503–516.
- 778 Hugh R, Leifson E (1953) The taxonomic significance of fermentative versus oxidative metabolism  
779 of carbohydrates by various gram negative bacteria. *J Bacteriol* 66:24–26.
- 780 Hyatt D, Chen G-L, Locascio PF, et al (2010) Prodigal: prokaryotic gene recognition and  
781 translation initiation site identification. *BMC Bioinformatics* 11:119. doi: 10.1186/1471-  
782 2105-11-119
- 783 Jones B (2010) Microbes in caves: agents of calcite corrosion and precipitation. *Geol Soc London,*  
784 *Spec Publ* 336:7–30. doi: 10.1144/SP336.2
- 785 Jones DS, Albrecht HL, Dawson KS, et al (2011) Community genomic analysis of an extremely  
786 acidophilic sulfur-oxidizing biofilm. *ISME J* 6:158–170. doi: 10.1038/ismej.2011.75
- 787 Kieser T, Bibb MJ, Buttner MJ, et al (2000) *Practical Streptomyces Genetics*. John Innes Cent. Ltd.  
788 529.
- 789 Kim SB, Falconer C, Williams E, Goodfellow M (1998) *Streptomyces thermocarboxydovorans* sp.  
790 nov. and *Streptomyces thermocarboxydus* sp. nov., two moderately thermophilic  
791 carboxydrotrophic species from soil. *Int J Syst Evol Microbiol* 48:59–68.
- 792 Kumon Y, Sasaki Y, Kato I, et al (2002) Codenitrification and denitrification are dual metabolic  
793 pathways through which dinitrogen evolves from nitrate in *Streptomyces antibioticus*. *J*  
794 *Bacteriol* 184:2963–2968. doi: 10.1128/JB.184.11.2963-2968.2002
- 795 Lechner M, Findeiß S, Steiner L, et al (2010) Proteinortho: Detection of (Co-)orthologs in large-  
796 scale analysis. *BMC Bioinformatics* 21:124. doi: 10.1186/1471-2105-12-124
- 797 Li Q, Chen X, Jiang Y, Jiang C (2016) Cultural, Physiological, and Biochemical Identification of  
798 Actinobacteria. In: *Actinobacteria - Basics and Biotechnological Applications*. doi:  
799 10.5772/61462

- 800 Maciejewska M, Adam D, Martinet L, et al (2016) A Phenotypic and Genotypic Analysis of the  
801 Antimicrobial Potential of Cultivable *Streptomyces* isolated from Cave Moonmilk Deposits.  
802 Front Microbiol. doi: 10.3389/fmicb.2016.01455
- 803 Maniloff J (1997) Nannobacteria: size limits and evidence. Nature 276:1776.
- 804 Melim L, Northup DE, Spilde M, Boston PJ (2015) Update: Living Reticulated Filaments from  
805 Herbstlabyrinth-Adventhöhle Cave System, Germany. J Caves Karst Stud: the National  
806 Speleological Society bulletin 77(2):87-90. doi: 10.4311/2015MB0112
- 807 Melim LA, Northup DE, Spilde MN, et al (2008) Reticulated filaments in cave pool speleothems:  
808 Microbe or mineral? J Cave Karst Stud 70:135–141.
- 809 Melim LA, Shinglman KM, Boston PJ, et al (2001) Evidence for Microbial Involvement in Pool  
810 Finger Precipitation, Hidden Cave, New Mexico. Geomicrobiol J 18:311–329. doi:  
811 10.1080/01490450152467813
- 812 Mendoza MLZ, Lundberg J, Ivarsson M, et al (2016) Metagenomic analysis from the interior of a  
813 speleothem in Tjuv-Ante's cave, Northern Sweden. PLoS One 11(3). doi:  
814 10.1371/journal.pone.0151577
- 815 Miller AZ, Hernández-Mariné M, Jurado V, et al (2012) Enigmatic reticulated filaments in  
816 subsurface granite. Environ Microbiol Rep 4:596–603. doi: 10.1111/j.1758-  
817 2229.2012.00375.x
- 818 Northup DE, Barns SM, Yu LE, et al (2003) Diverse microbial communities inhabiting  
819 ferromanganese deposits in Lechuguilla and Spider Caves. Environ Microbiol 5:1071–1086.  
820 doi: 10.1046/j.1462-2920.2003.00500.x
- 821 Northup DE, Lavoie KH (2001) Geomicrobiology of Caves: A Review. Geomicrobiol J 18:199–  
822 222. doi: 10.1080/01490450152467750
- 823 Northup DE, Melim L a., Spilde MN, et al (2011) Lava Cave Microbial Communities Within Mats

- 824 and Secondary Mineral Deposits: Implications for Life Detection on Other Planets.  
825 *Astrobiology* 11:601–618. doi: 10.1089/ast.2010.0562
- 826 Pine L, Boone CJ (1967) Comparative Cell Wall Analyses of Morphological Forms Within the  
827 Genus *Actinomyces*. *J Bacteriol* 94:875–883.
- 828 Portillo MC, Gonzalez JM (2011) Moonmilk Deposits Originate from Specific Bacterial  
829 Communities in Altamira Cave (Spain). *Microb Ecol* 61:182–189. doi: 10.1007/s00248-010-  
830 9731-5
- 831 Portillo MC, Leff JW, Lauber CL, Fierer N (2013) Cell Size Distributions of Soil Bacterial and  
832 Archaeal Taxa. *Appl Environ Microbiol* 79:7610–7617. doi: 10.1128/AEM.02710-13
- 833 Portillo MC, Porca E, Cuezva S, et al (2009) Is the availability of different nutrients a critical factor  
834 for the impact of bacteria on subterranean carbon budgets? *Naturwissenschaften* 96:1035–  
835 1042. doi: 10.1007/s00114-009-0562-5
- 836 Prakash SB, Debnath M, Prasad GB (2012) *Microbes: Concepts and Applications*. Wiley-  
837 Blackwell, pp 491–493, doi: 10.1002/9781118311912.
- 838 Price GD, Woodger FJ, Badger MR, et al (2004) Identification of a *SulP*-type bicarbonate  
839 transporter in marine cyanobacteria. *Proc Natl Acad Sci U S A* 101:18228–18233. doi:  
840 10.1073/pnas.0405211101
- 841 Pullan ST, Chandra G, Bibb MJ, Merrick M (2011) Genome-wide analysis of the role of GlnR in  
842 *Streptomyces venezuelae* provides new insights into global nitrogen regulation in  
843 actinomycetes. *BMC Genomics* 12:175. doi: 10.1186/1471-2164-12-175
- 844 Reitschuler C, Lins P, Schwarzenauer T, et al (2015) New Undescribed Lineages of Non-  
845 extremophilic Archaea Form a Homogeneous and Dominant Element Within Alpine  
846 Moonmilk Microbiomes. *Geomicrobiol J* 32: 890-902.  
847 doi.org/10.1080/01490451.2015.1025317

- 848 Reitschuler C, Lins P, Wagner AO, Illmer P (2014) Cultivation of moonmilk-born non-  
849 extremophilic Thaumand Euryarchaeota in mixed culture. *Anaerobe* 29:73–79. doi:  
850 10.1016/j.anaerobe.2013.10.002
- 851 Reitschuler C, Spötl C, Hofmann K, et al (2016) Archaeal Distribution in Moonmilk Deposits from  
852 Alpine Caves and Their Ecophysiological Potential. *Microb Ecol* 71:686–699.
- 853 Richter DK, Immenhauser A, Neuser RD (2008) Electron backscatter diffraction documents  
854 randomly orientated c-axes in moonmilk calcite fibres: Evidence for biologically induced  
855 precipitation. *Sedimentology* 55:487–497. doi: 10.1111/j.1365-3091.2007.00915.x
- 856 Rooney DC, Hutchens E, Clipson N, et al (2010) Microbial Community Diversity of Moonmilk  
857 Deposits at Ballynamintra Cave, Co. Waterford, Ireland. *Microb Ecol* 60:753–761. doi:  
858 10.1007/s00248-010-9693-7
- 859 Sanchez-Moral S, Portillo MC, Janices I, et al (2012) The role of microorganisms in the formation  
860 of calcitic moonmilk deposits and speleothems in Altamira Cave. *Geomorphology* 139–  
861 140:285–292. doi: 10.1016/j.geomorph.2011.10.030
- 862 Shoun H, Kano M, Baba I, et al (1998) Denitrification by actinomycetes and purification of  
863 dissimilatory nitrite reductase and azurin from *Streptomyces thioluteus*. *J Bacteriol* 180:4413–  
864 4415.
- 865 Smith KS, Ferry JG (2000) Prokaryotic carbonic anhydrases. *FEMS Microbiol. Rev.* 24:335–366.
- 866 Spilde MN, Northup DE, Boston PJ, et al (2005) Geomicrobiology of Cave Ferromanganese  
867 Deposits: A Field and Laboratory Investigation. *Geomicrobiol J* 22:99–116. doi:  
868 10.1080/01490450590945889
- 869 Steinberger RE, Allen AR, Hansma HG, Holden PA (2002) Elongation Correlates with Nutrient  
870 Deprivation in *Pseudomonas aeruginosa* Unsaturated Biofilms. *Microb Ecol* 43:416–423.  
871 doi: 10.1007/s00248-001-1063-z

- 872 Stocks-Fischer S, Galinat JK, Bang SS (1999) Microbiological precipitation of CaCO<sub>3</sub>. *Soil Biol*  
873 *Biochem* 31:1563–1571. doi: 10.1016/S0038-0717(99)00082-6
- 874 Tiffert Y, Supra P, Wurm R, et al (2008) The *Streptomyces coelicolor* GlnR regulon: Identification  
875 of new GlnR targets and evidence for a central role of GlnR in nitrogen metabolism in  
876 actinomycetes. *Mol Microbiol* 67:861–880. doi: 10.1111/j.1365-2958.2007.06092.x
- 877 Tisato N, Torriani SFF, Monteux S, et al (2015) Microbial mediation of complex subterranean  
878 mineral structures. *Sci Rep* 5:15525. doi: 10.1038/srep15525
- 879 Uwins PJR, Taylor AP, Webb RI (2000) Nannobacteria, fiction or fact? In: *Organic Matter and*  
880 *Mineralisation: Thermal Alteration, Hydrocarbon Generation and Role in Metallogenesis*. pp  
881 421–444
- 882 Verrecchia EP, Verrecchia KE (1994) Needle-fiber calcite: a critical review and a proposed  
883 classification. *J Sediment Res* 64. doi: 10.1306/D4267E33-2B26-11D7-8648000102C1865D
- 884 Wills AP, Chan ECS (1978) Morphogenetic expression of *Arthrobacter globiformis* 425 in  
885 continuous culture with carbon or biotin limitation. *Can J Microbiol* 24:28–30. doi:  
886 10.1139/m78-005
- 887 Young KD (2006) The Selective Value of Bacterial Shape. *Microbiol Mol Biol Rev* 70:660–703.  
888 doi: 10.1128/MMBR.00001-06

889

890

891

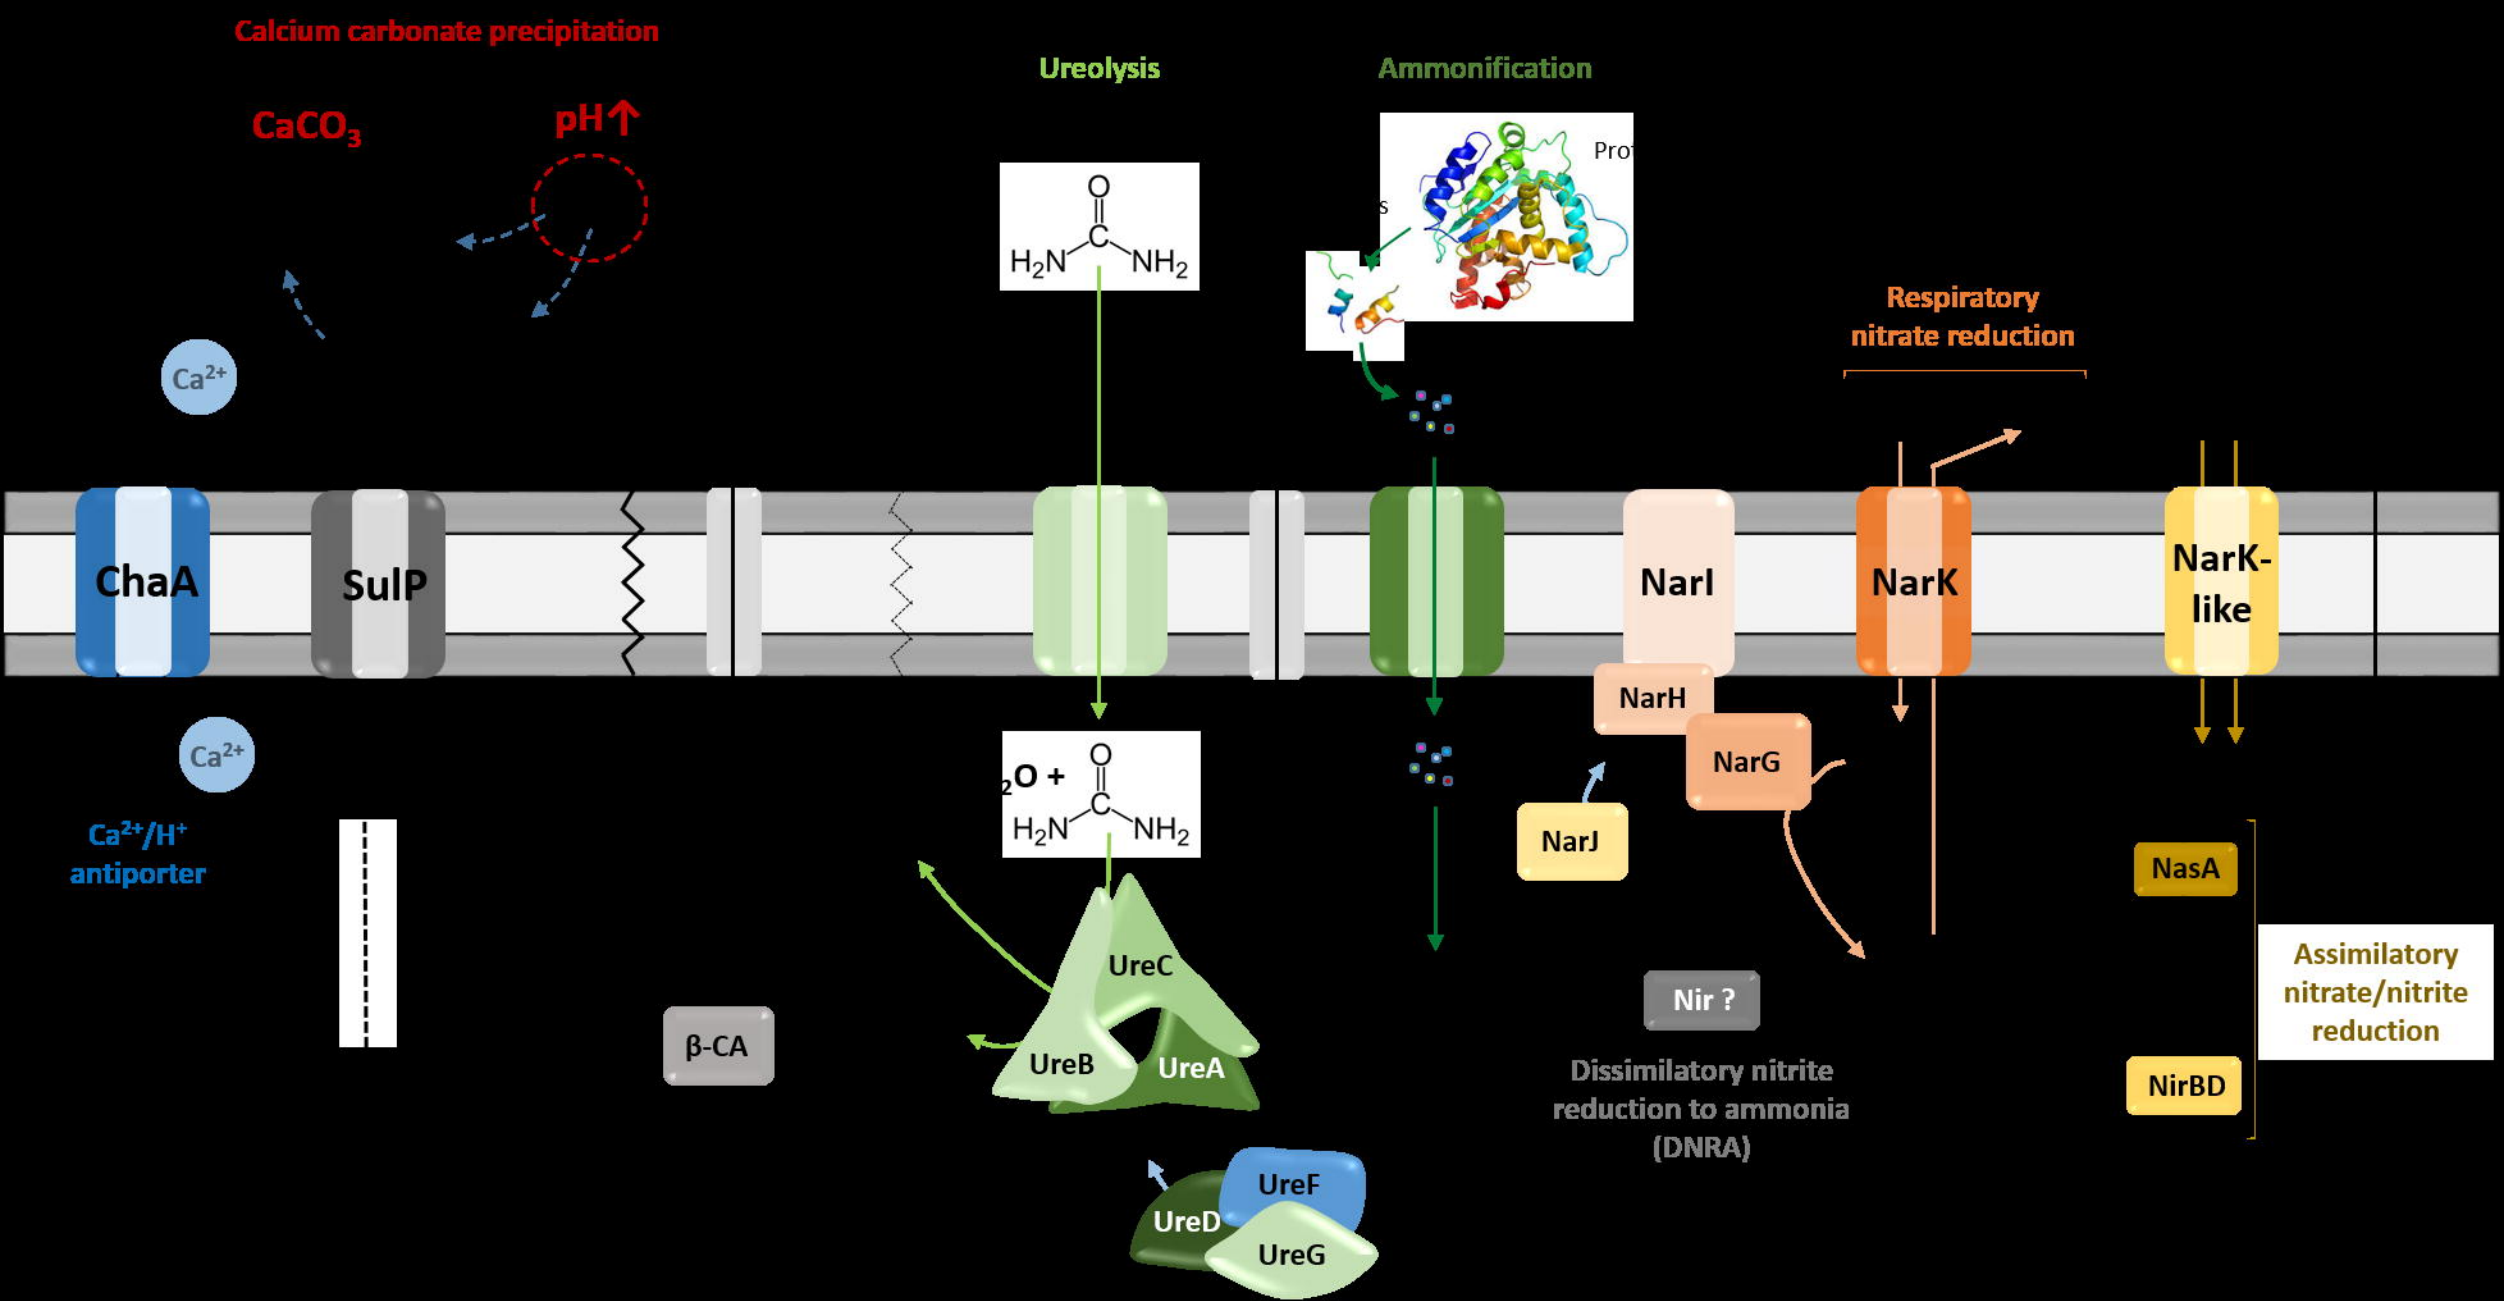



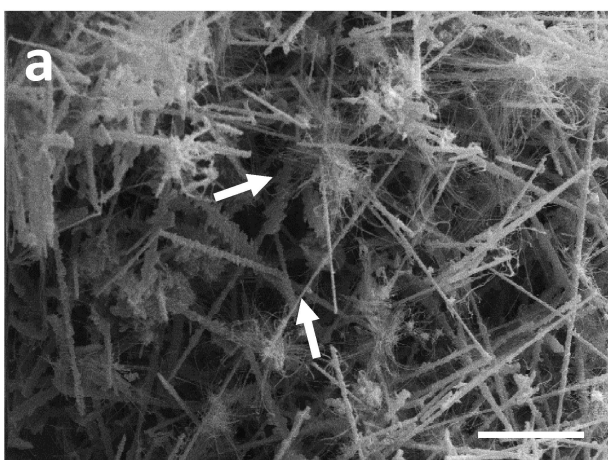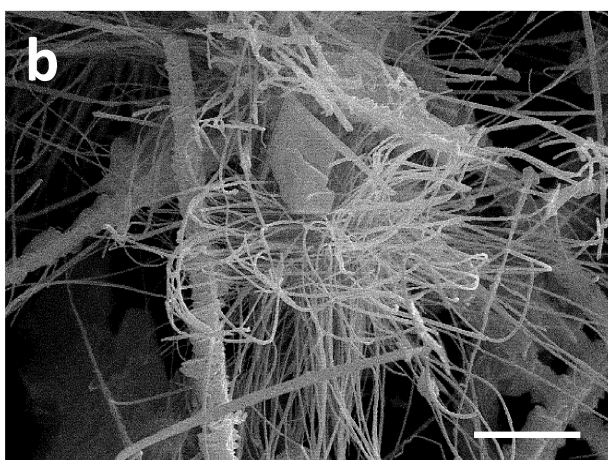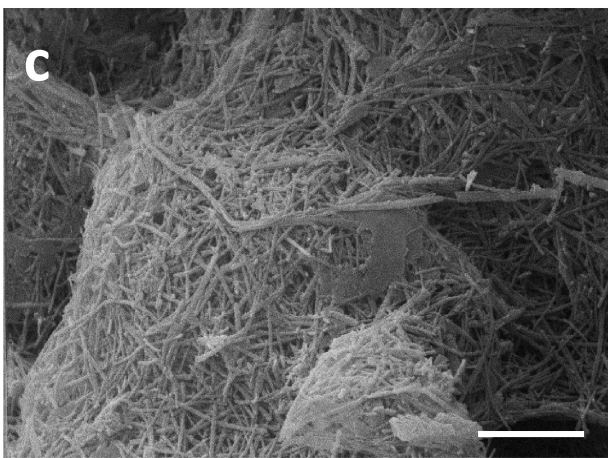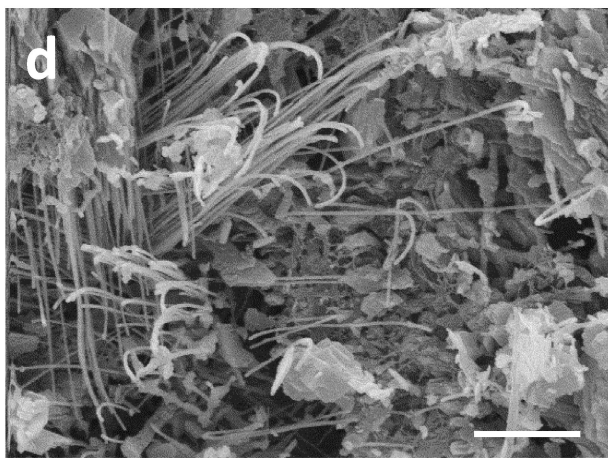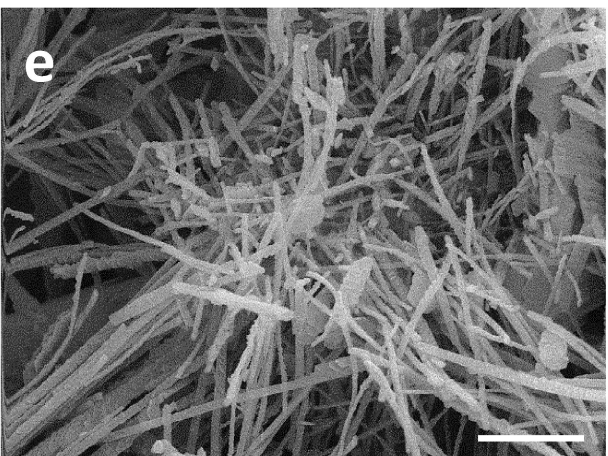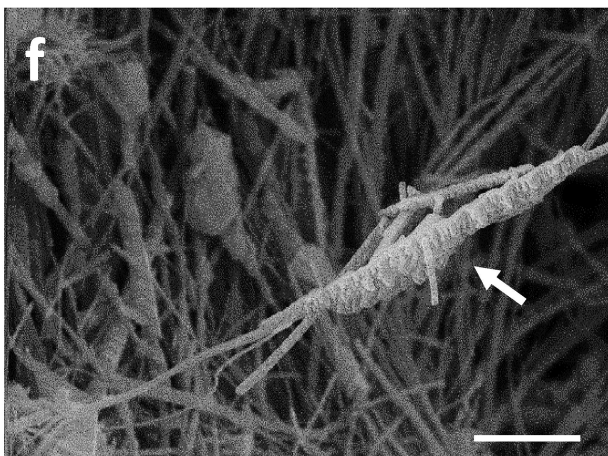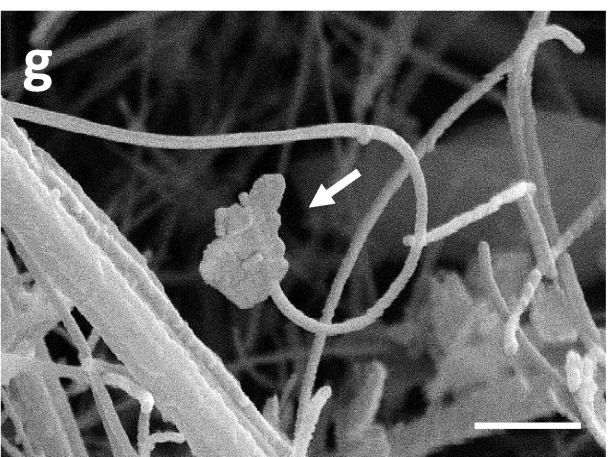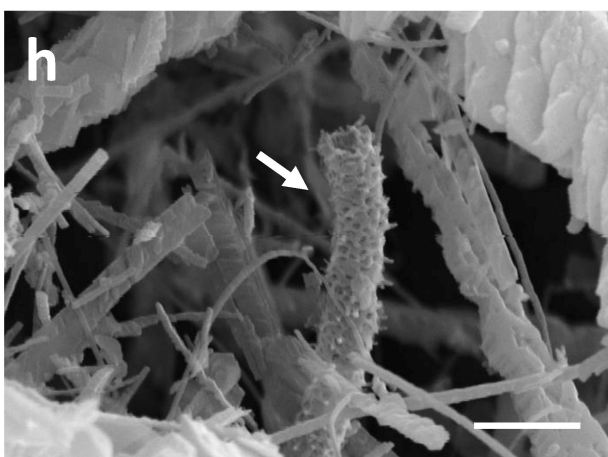



**a**

3 days

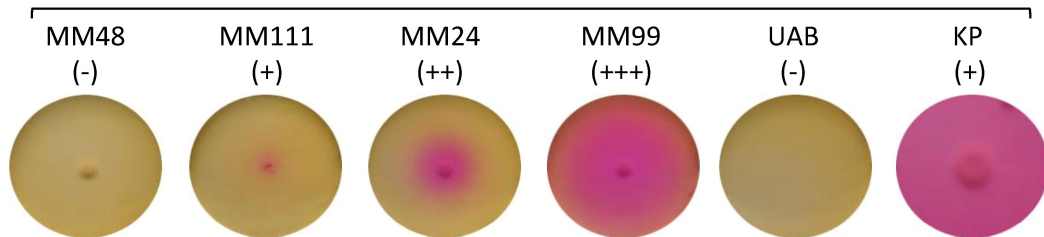

8 days

15 days

21 days

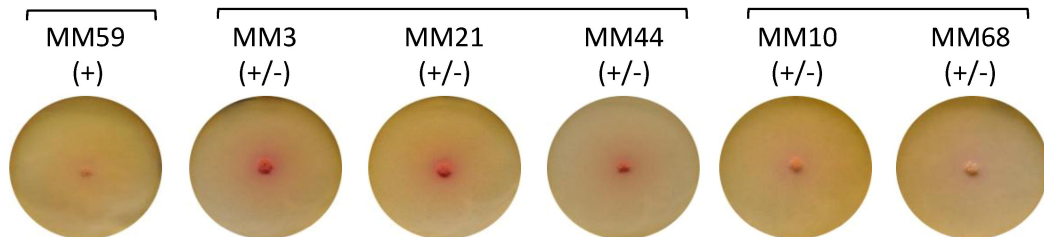**b**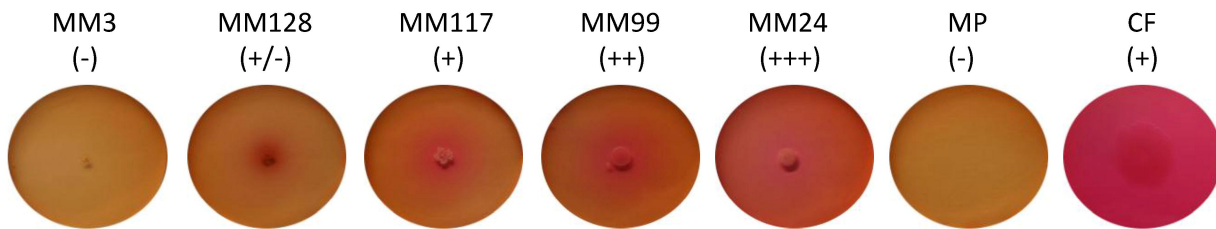**c**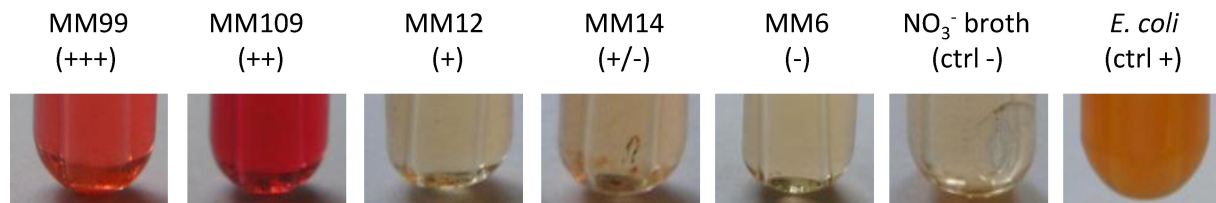**d**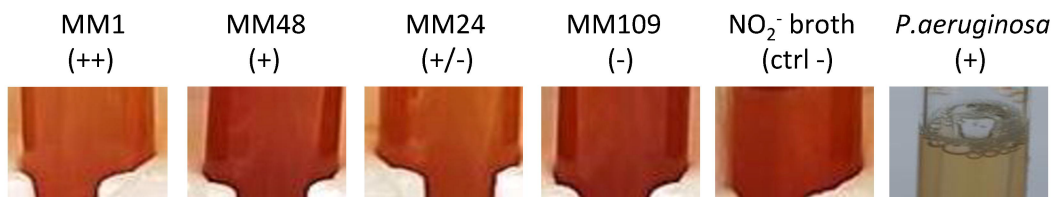



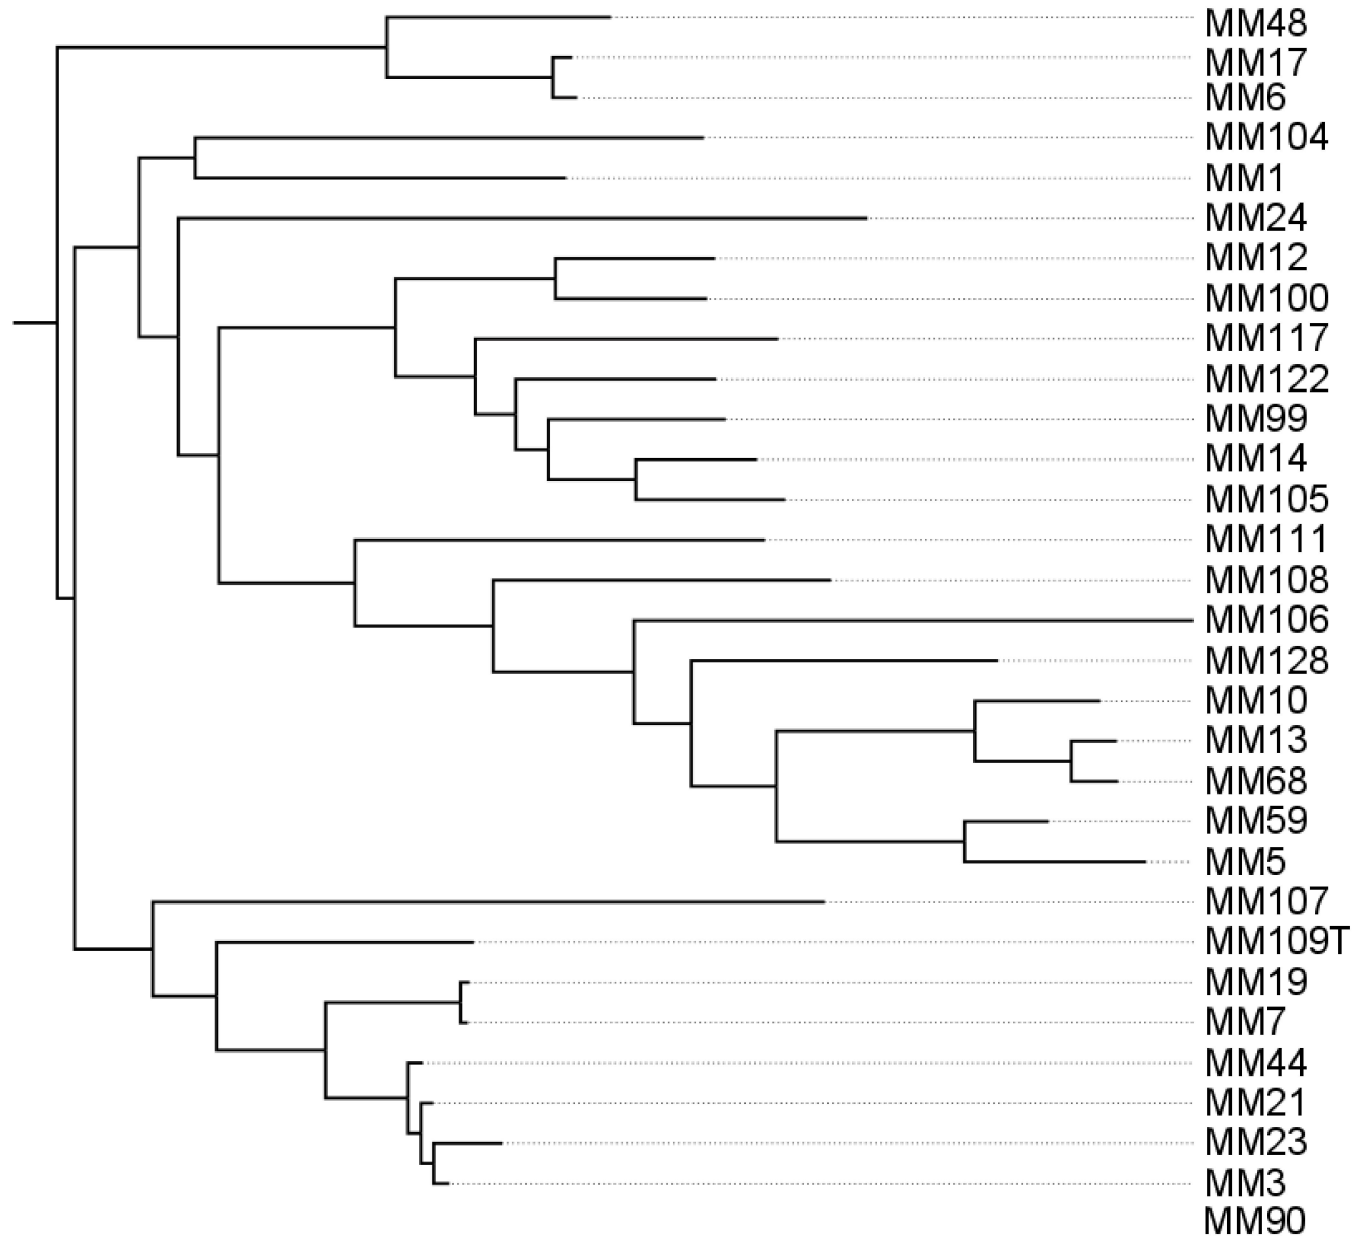

|        | U | A | Total | NO <sub>3</sub> <sup>-</sup> | NO <sub>2</sub> <sup>-</sup> |
|--------|---|---|-------|------------------------------|------------------------------|
| MM48   | 0 | 3 | 3     | 4                            | 0                            |
| MM17   | 0 | 3 | 3     | 0                            | 1                            |
| MM6    | 0 | 0 | 0     | 0                            | 3                            |
| MM104  | 0 | 4 | 4     | 0                            | 1                            |
| MM1    | 0 | 0 | 0     | 0                            | 3                            |
| MM24   | 5 | 3 | 8     | 0                            | 2                            |
| MM12   | 0 | 2 | 2     | 1                            | 0                            |
| MM100  | 4 | 4 | 8     | 3                            | 1                            |
| MM117  | 0 | 2 | 2     | 2                            | 1                            |
| MM122  | 6 | 4 | 10    | 4                            | 3                            |
| MM99   | 6 | 3 | 9     | 4                            | 1                            |
| MM14   | 4 | 4 | 8     | 1                            | 0                            |
| MM105  | 4 | 3 | 7     | 1                            | 3                            |
| MM111  | 4 | 3 | 7     | 0                            | 0                            |
| MM108  | 5 | 4 | 9     | 1                            | 0                            |
| MM106  | 0 | 4 | 4     | 4                            | 2                            |
| MM128  | 0 | 2 | 2     | 0                            | 0                            |
| MM10   | 1 | 3 | 4     | 4                            | 1                            |
| MM13   | 0 | 2 | 2     | 1                            | 2                            |
| MM68   | 1 | 3 | 4     | 1                            | 3                            |
| MM59   | 3 | 4 | 7     | 1                            | 3                            |
| MM5    | 4 | 4 | 8     | 1                            | 1                            |
| MM107  | 0 | 2 | 2     | 0                            | 2                            |
| MM109T | 0 | 3 | 3     | 4                            | 0                            |
| MM19   | 0 | 3 | 3     | 1                            | 2                            |
| MM7    | 0 | 3 | 3     | 3                            | 3                            |
| MM44   | 2 | 4 | 6     | 0                            | 3                            |
| MM21   | 2 | 4 | 6     | 0                            | 1                            |
| MM23   | 0 | 4 | 4     | 1                            | 2                            |
| MM3    | 2 | 4 | 6     | 1                            | 3                            |
| MM90   | 0 | 2 | 2     | 2                            | 1                            |

0.04

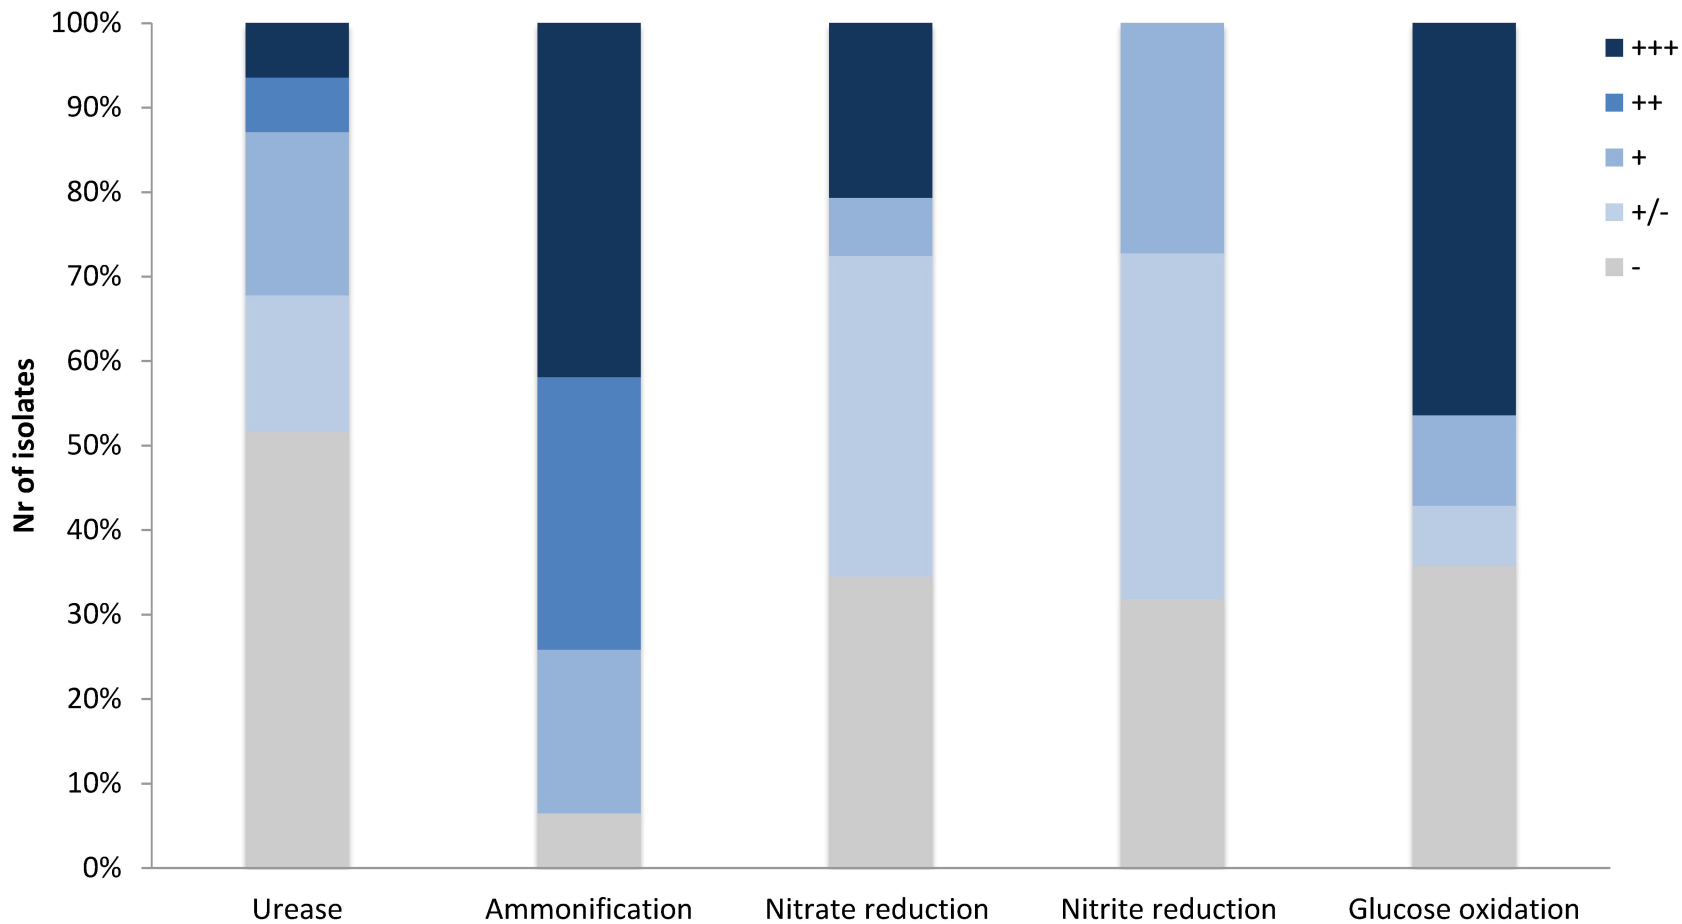



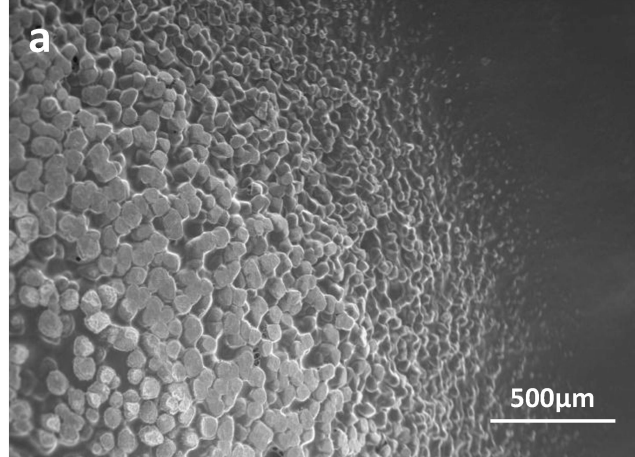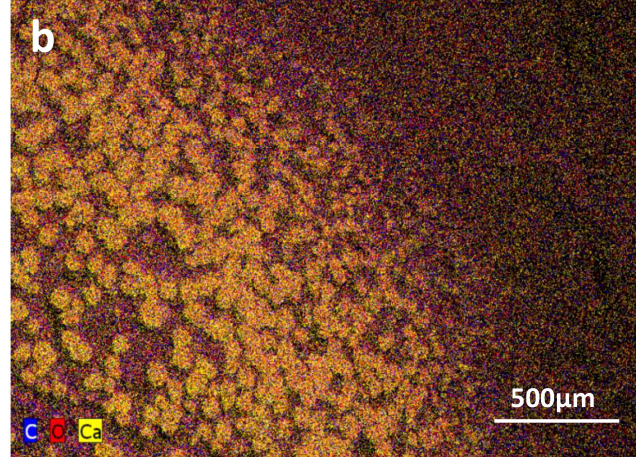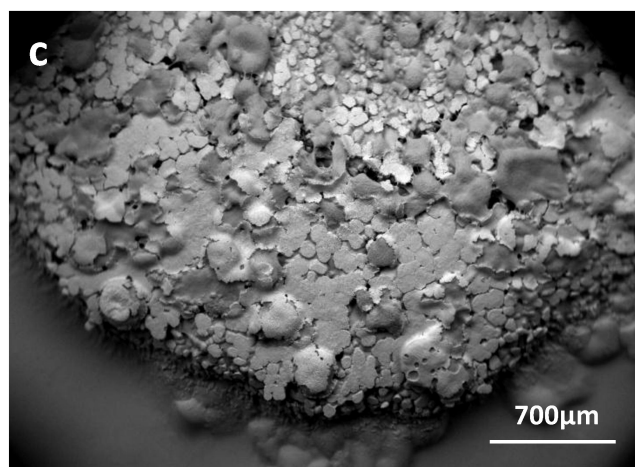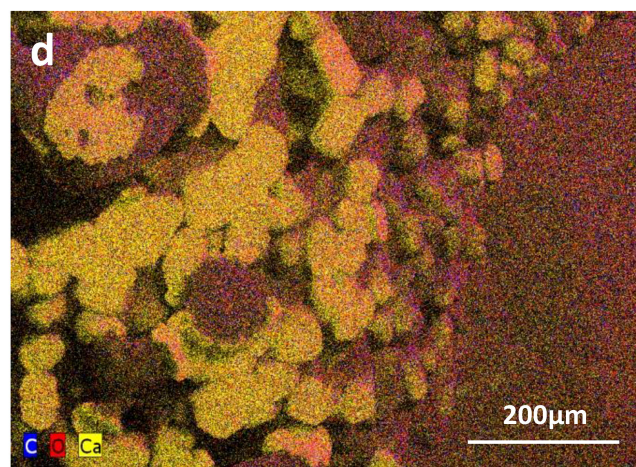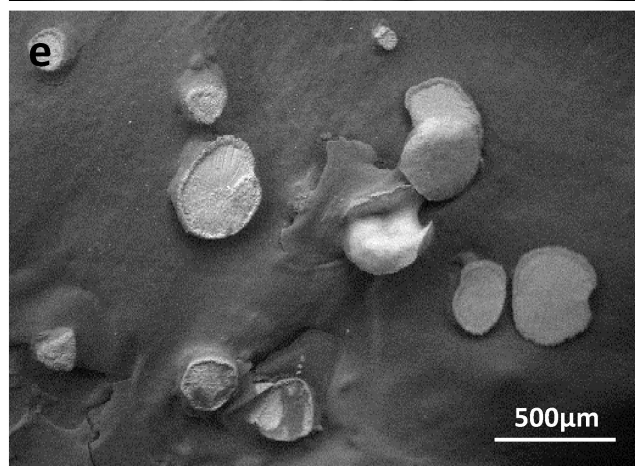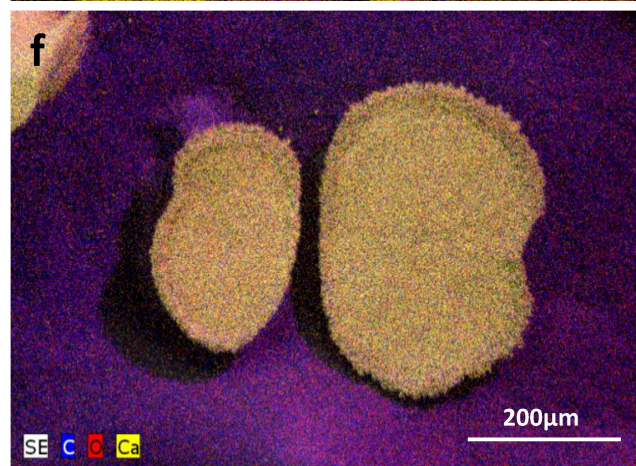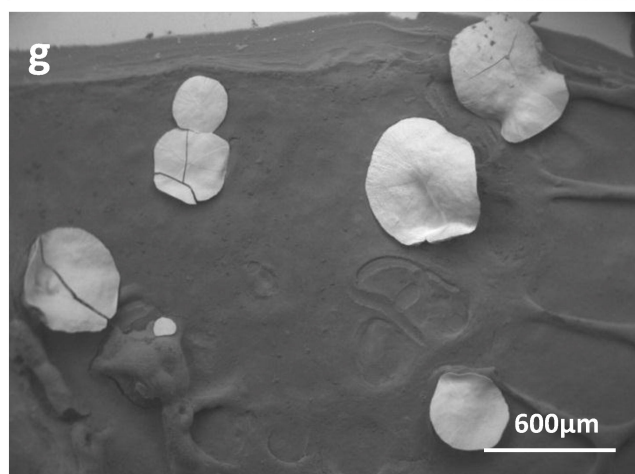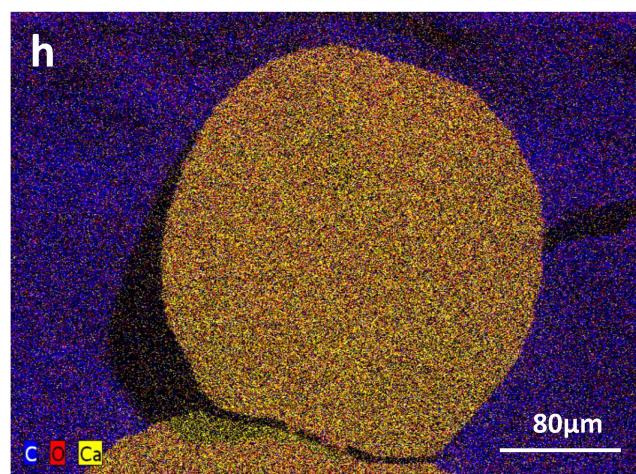



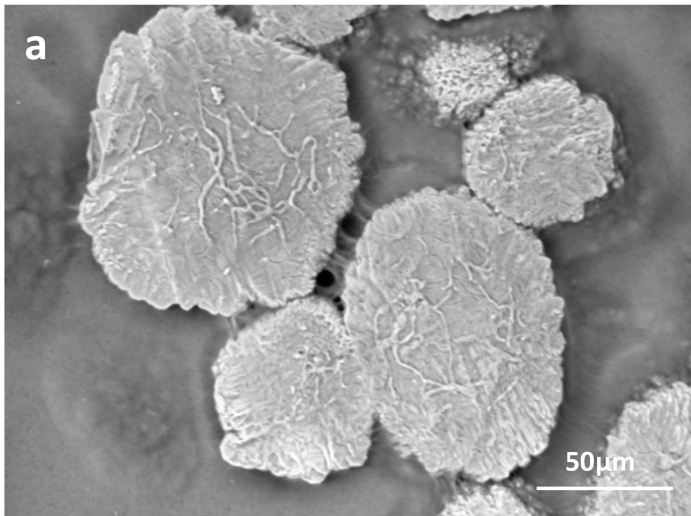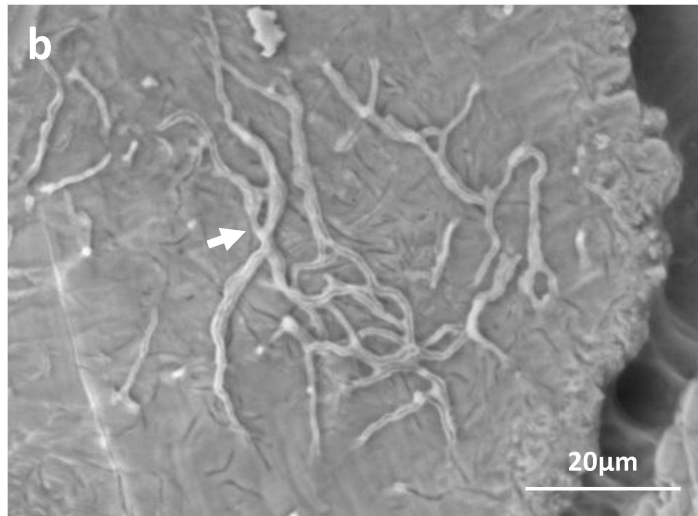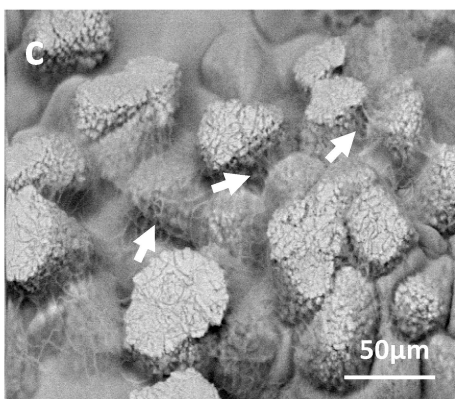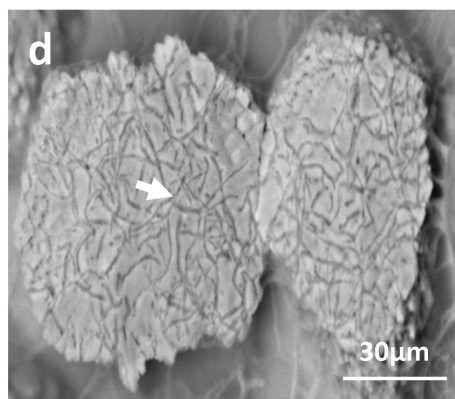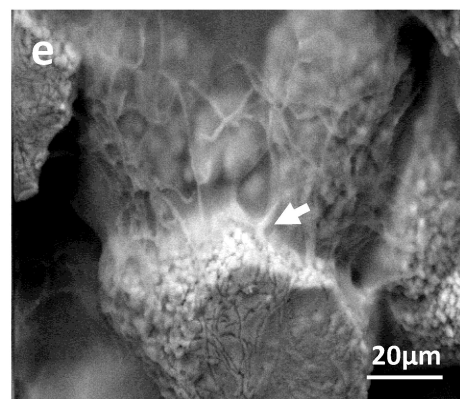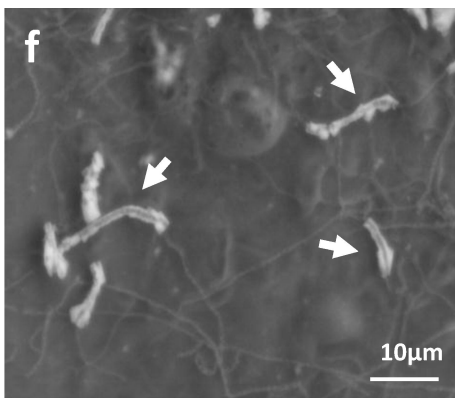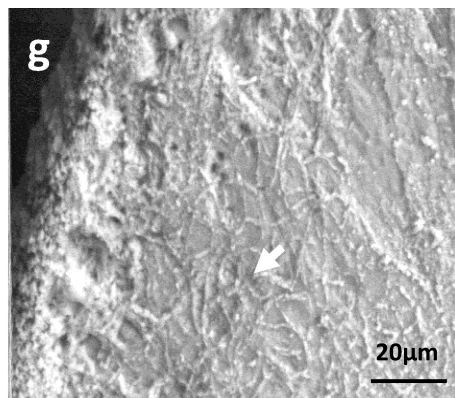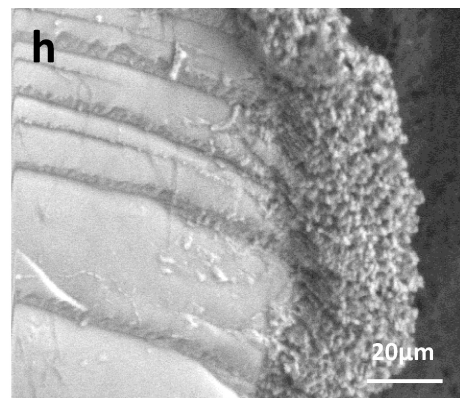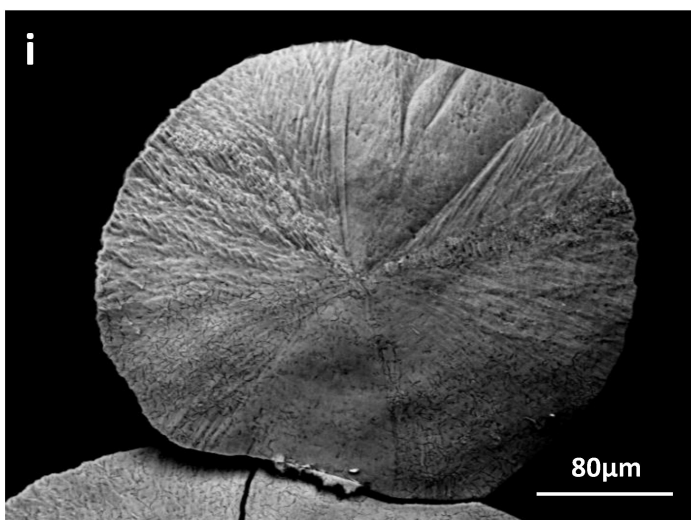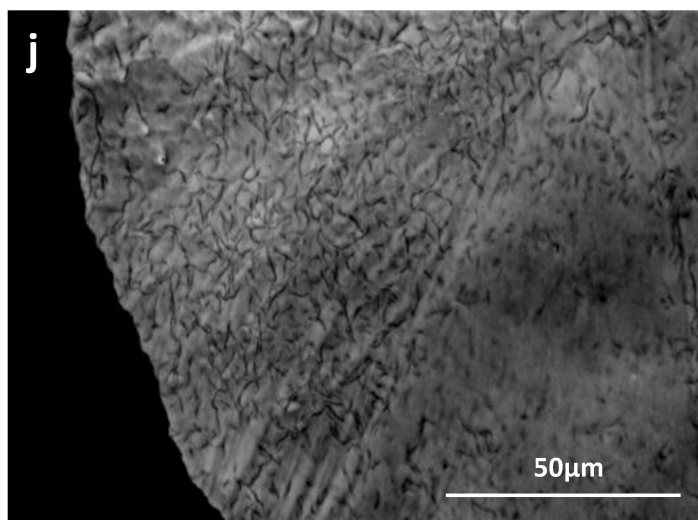

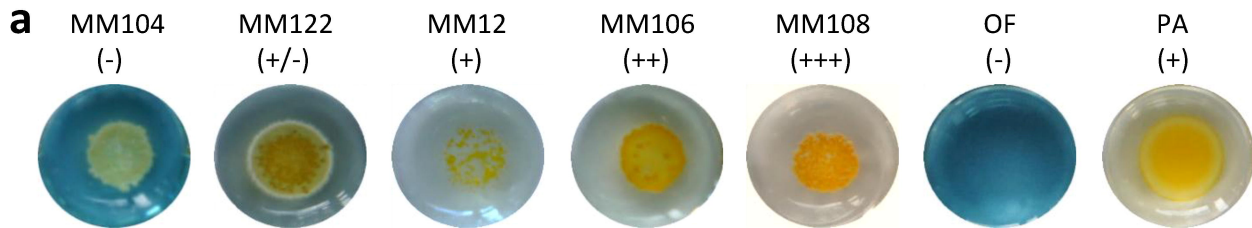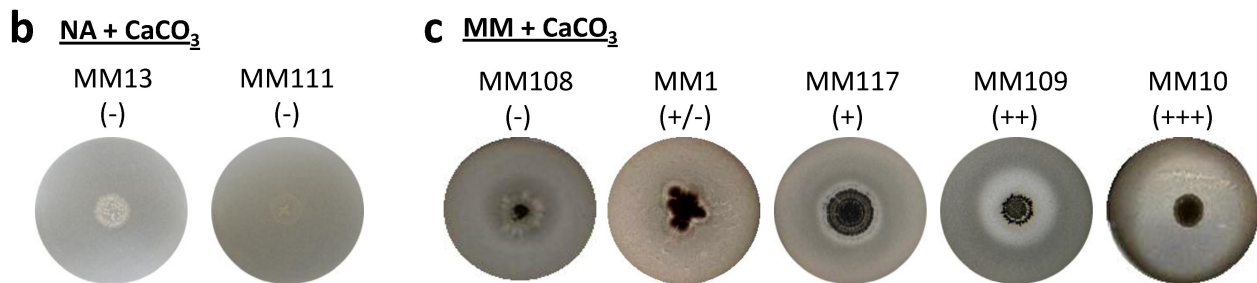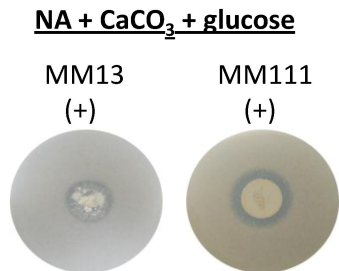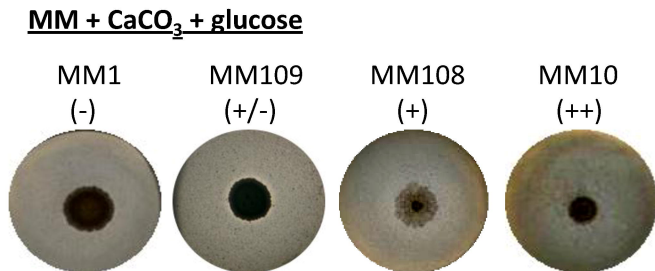

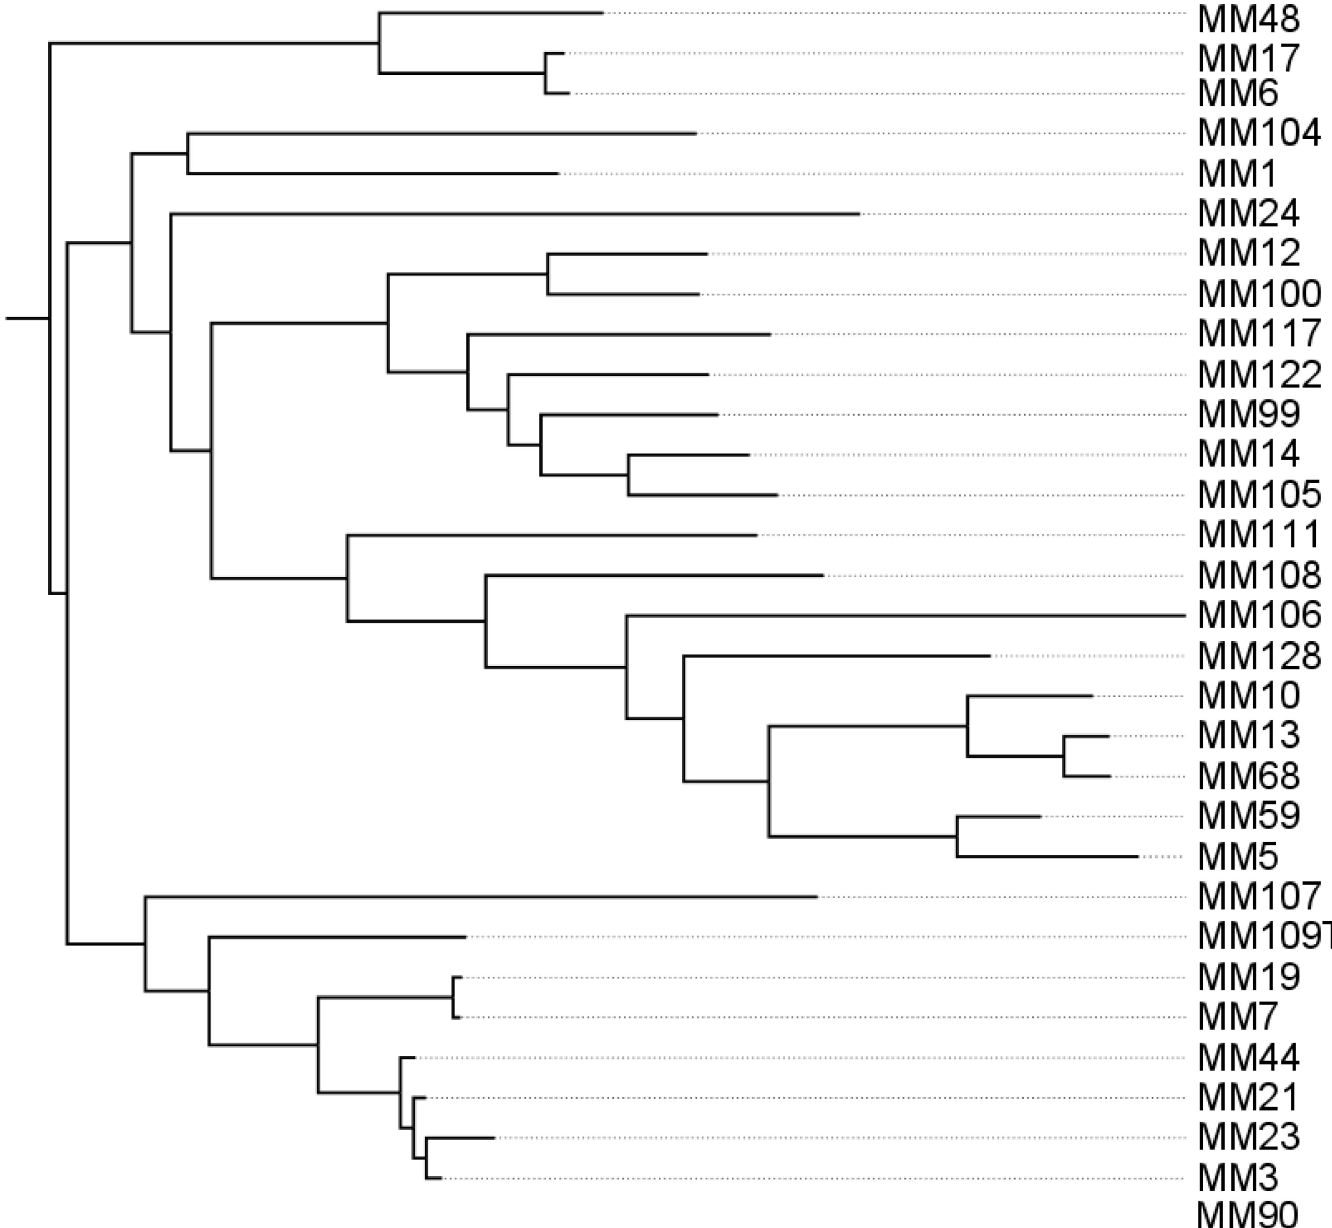

|        | O | MM | MMg | NA | NAg |
|--------|---|----|-----|----|-----|
| MM48   | 4 | 4  | 1   | 0  | 0   |
| MM17   | 0 | 4  | 0   | 0  | 0   |
| MM6    | 0 | 4  | 0   | 0  | 0   |
| MM104  | 0 | 2  | 0   | 0  | 0   |
| MM1    | 0 | 1  | 0   | 0  | 0   |
| MM24   | 4 | 1  | 0   | 0  | 0   |
| MM12   | 2 | 0  | 0   | 0  | 0   |
| MM100  | 0 | 2  | 0   | 0  | 0   |
| MM117  | 4 | 2  | 0   | 0  | 0   |
| MM122  | 1 | 2  | 0   | 0  | 0   |
| MM99   | 0 | 3  | 0   | 0  | 0   |
| MM14   | 4 | 3  | 1   | 0  | 0   |
| MM105  | 4 | 2  | 0   | 0  | 1   |
| MM111  | 4 | 1  | 2   | 0  | 2   |
| MM108  | 4 | 0  | 2   | 0  | 0   |
| MM106  | 3 | 0  | 0   | 0  | 0   |
| MM128  | 2 | 4  | 3   | 0  | 1   |
| MM10   | 2 | 4  | 3   | 0  | 0   |
| MM13   | 4 | 0  | 0   | 0  | 1   |
| MM68   | 4 | 4  | 3   | 0  | 1   |
| MM59   | 0 | 3  | 0   | 0  | 0   |
| MM5    | 0 | 3  | 0   | 0  | 0   |
| MM107  | 0 | 1  | 0   | 0  | 0   |
| MM109T | 4 | 3  | 1   | 0  | 0   |
| MM19   | 0 | 0  | 0   | 0  | 0   |
| MM7    | 3 | 4  | 0   | 0  | 0   |
| MM44   | 4 | 1  | 0   | 0  | 1   |
| MM21   | 4 | 3  | 0   | 0  | 0   |
| MM23   | 1 | 0  | 1   | 0  | 1   |
| MM3    | 4 | 3  | 0   | 0  | 0   |
| MM90   | 3 | 2  | 0   | 0  | 1   |

0.04
